## Structures reveal opening of the store-operated calcium channel Orai

Xiaowei Hou<sup>1</sup>, Shana R. Burstein<sup>1</sup>, and Stephen B. Long<sup>1</sup>

<sup>1</sup>Structural Biology Program, Memorial Sloan Kettering Cancer Center, 1275 York Avenue, New York, NY 10065 USA

### Abstract

The store-operated calcium ( $\text{Ca}^{2+}$ ) channel Orai governs  $\text{Ca}^{2+}$  influx through the plasma membrane of many non-excitable cells in metazoans. The channel opens in response to depletion of  $\text{Ca}^{2+}$  within the endoplasmic reticulum (ER). Loss- and gain-of-function mutants of Orai cause disease. Our previous work revealed the structure of Orai with a closed pore. Here, using a gain-of-function mutation that constitutively activates the channel, we present an X-ray structure of *Drosophila melanogaster* Orai in an open conformation. Well-defined electron density maps reveal that the open pore is dramatically dilated on its cytosolic side in comparison to the slender closed pore. Cations and anions bind in different regions of the open pore, informing mechanisms for ion permeation and the exquisite selectivity of the channel for  $\text{Ca}^{2+}$ . Opening of the pore requires the release of cytosolic latches. Together with additional X-ray structures of an unlatched-but-closed intermediate, we propose a sequence for store-operated activation.

## 1 Introduction

2 The dearth of calcium ( $\text{Ca}^{2+}$ ) ions in the cytosol of non-excitable metazoan cells under “resting”  
3 conditions allows transient increases in the cytosolic calcium concentration to relay internal messages  
4 and enables cells to respond to external stimuli. These cytosolic calcium signals regulate a plethora of  
5 processes including gene transcription, cell motility, exocytosis, and cell metabolism (Clapham, 2007).  
6 Short-lived increases in cytosolic  $[\text{Ca}^{2+}]$  can be generated by the release of  $\text{Ca}^{2+}$  into the cytosol from  
7 the endoplasmic reticulum (ER) through ion channels such as the IP3R channel (Clapham, 2007). A  
8 second, more long-lasting elevation in cytosolic calcium occurs by the opening of Orai channels in the  
9 plasma membrane that allow  $\text{Ca}^{2+}$  ions to flow into the cell (Hogan, Lewis, & Rao, 2010). The driving  
10 force for  $\text{Ca}^{2+}$  entry is substantial: the negative voltage inside the cell is an attractive force and in the  
11 same direction as the chemical gradient for  $\text{Ca}^{2+}$  – approximately 2mM  $[\text{Ca}^{2+}]$  outside the cell and  
12 20,000–fold lower inside the cell ( $\sim 100$  nM). Despite these driving forces Orai conducts ions  
13 approximately 1000-times slower than most channels (about  $10^4$  ions per second), and this probably  
14 serves an important physiological role: it prevents overwhelming the cell with  $\text{Ca}^{2+}$  when the channel  
15 opens (Hou, Pedi, Diver, & Long, 2012; Prakriya & Lewis, 2006). How the open pore of Orai throttles  
16 the flow of  $\text{Ca}^{2+}$  is not clear. The channel is one of the most highly selective channels for  $\text{Ca}^{2+}$  but the  
17 mechanism for  $\text{Ca}^{2+}$  selectivity is not fully understood, partly because the conformation of the open  
18 pore of Orai is not known.

19 Calcium influx through Orai is necessary for activation of immune response genes in T cells  
20 and a range of other physiological processes (Feske, Prakriya, Rao, & Lewis, 2005; Lacruz & Feske,  
21 2015; Prakriya & Lewis, 2015). Mutations in Orai have been implicated in a spectrum of maladies.  
22 Generally, loss-of-function mutations cause immune system dysfunction, including severe combined  
23 immunodeficiency-like disorders (Feske et al., 2006; Lacruz & Feske, 2015). Gain-of-function

24 mutations of Orai have also been identified. These result in constitutive channel activation and have  
25 been associated with tubular aggregate myopathy and Stormorken syndromes (Lacruz & Feske,  
26 2015).

27         There are three Orai proteins in humans (Orai1-3). *Drosophila melanogaster* contains one  
28 ortholog (Orai), which shares 73% sequence identity to human Orai1, and is the most studied non-  
29 human Orai channel. The channels have broad tissue distribution and are tightly regulated (Hogan et  
30 al., 2010). In the quiescent state before activation, the ion pore of Orai is closed to prevent aberrant  
31  $\text{Ca}^{2+}$  flux through the plasma membrane. The channel is activated by the depletion of  $\text{Ca}^{2+}$  from the  
32 endoplasmic reticulum (ER), and as such it was characterized as the calcium release-activated calcium  
33 (CRAC) channel responsible for store-operated calcium entry (SOCE) before the molecular  
34 components were known (Hoth & Penner, 1992). Orai was identified as the protein that forms the  
35 channel's pore and STIM was identified as its regulator (Feske et al., 2006; Liou et al., 2005; Prakriya  
36 et al., 2006; Roos et al., 2005; M. Vig et al., 2006; Yeromin et al., 2006; Shenyuan L Zhang et al., 2006;  
37 S. L. Zhang et al., 2005). Recent studies have uncovered the general mechanism of channel  
38 activation, which is distinct from the activation mechanisms known for other channels (reviewed in  
39 (Hogan & Rao, 2015; Prakriya & Lewis, 2015)). As a result of depletion of  $\text{Ca}^{2+}$  within the ER, STIM,  
40 which is a single-pass membrane protein resident to the ER, localizes to regions where the ER and  
41 plasma membranes are separated by only 10-20 nm. Here STIM physically interacts with cytosolic  
42 regions of Orai to open its pore. We previously determined the X-ray structure of *Drosophila*  
43 *melanogaster* Orai in a "quiescent" conformation with a closed ion pore but the conformational  
44 changes leading to opening and the conformation of the opened pore are unknown (Hou et al.,  
45 2012).

46           The X-ray structure of the quiescent conformation of Orai provides a foundation to  
47 understand the molecular basis for function (Hou et al., 2012). The channel is formed from an  
48 assembly of six Orai subunits that surround a single ion pore, which is perpendicular to the plasma  
49 membrane in a cellular setting (Figure 1A) (Hou et al., 2012). Although the oligomeric state revealed  
50 by the X-ray structure was a surprise, further studies have shown that the functional state of human  
51 Orai1 is also as a hexamer of subunits (Cai et al., 2016; Yen, Lokteva, & Lewis, 2016). Each Orai  
52 subunit contains four transmembrane helices (M1-M4) and a cytosolic M4-ext helix (Figure 1). Amino  
53 acid side chains on the six M1 helices, one from each subunit, form the walls of the pore (Figure 1B).  
54 In contrast to many ion channels, amino acid side chains establish the dimensions and chemical  
55 environment along the entirety of the pore. The M2 and M3 helices form a shell surrounding the M1  
56 helices and shield them from the membrane. The M4 helices are located at the periphery and  
57 contain two segments, M4a and M4b, delineated by a bend at a conserved proline residue (Pro288).  
58 Following M4b, M4-ext helices extend into cytosol. The M4-ext helices from neighboring subunits  
59 interact with one another through pairwise helical coiled-coil packing, which creates a belt-like  
60 arrangement surrounding the channel on its intracellular side (Figure 1A). Mutation of the  
61 hydrophobic residues that mediate the coiled-coils has been shown to prevent channel activation by  
62 STIM, possibly by reducing the affinity for STIM (Muik et al., 2008; Navarro-Borelly et al., 2008).  
63 Because STIM also contains regions that are predicted to participate in coiled-coil helical packing, it  
64 has been proposed that STIM interacts with the M4-ext helices through such an interaction and that  
65 the structure represents a quiescent conformation prior to the binding of STIM (Hou et al., 2012).  
66 How the pore opens is not yet clear.

67           The closed pore is approximately 55 Å long, narrow, and impervious to ions (Figure 1B). It  
68 contains four sections: a glutamate ring on the extracellular side that forms the selectivity filter

69 (comprised of Glu178 residues from the six subunits), a ~15 Å-long hydrophobic section, a ~15 Å-long  
70 basic section, and cytosolic section (Figure 1B). Mutation of the corresponding glutamate in human  
71 Orai1 to aspartate (E106D) disrupts Ca<sup>2+</sup>-selectivity (Prakriya et al., 2006; Monika Vig et al., 2006;  
72 Yeromin et al., 2006). The walls of the basic section are formed by three amino acids from each of  
73 the six M1 helices that are conserved as lysine or arginine in Orai channels (Figure 1B). Mutation of  
74 one of the basic amino acids in human Orai1 (R91W, corresponding to K163W in *Drosophila* Orai)  
75 causes a severe combined immune deficiency-like disorder by preventing channel activation (Feske et  
76 al., 2006). The presence of eighteen basic residues (three from each of the six subunits) within the  
77 pore of a cation channel is highly unusual and would presumably establish an electrostatic barrier  
78 that opposes Ca<sup>2+</sup> permeation in the closed state. We found that the basic region is a binding site for  
79 anion(s) that stabilize the arginine/lysine residues in close proximity (Hou et al., 2012). In the  
80 structure, an iron complex that co-purifies with the channel, which may represent (FeCl<sub>6</sub>)<sup>3-</sup>, binds at  
81 the center of the basic residues like a plug. While the physiological ligand may or may not be an iron  
82 complex, it would seem that the plug would need to be displaced to allow Ca<sup>2+</sup> permeation through  
83 the pore when the channel is open.

84 A structure of Orai with an open pore would markedly advance our understandings of the  
85 channel but structural studies of the complex between Orai and STIM are complicated by the low  
86 affinity of the interaction and because the stoichiometry between Orai and STIM is not fully  
87 established. Gain-of-function mutations of Orai provide a potential experimental advantage for  
88 capturing a structure of an open pore because STIM would not necessarily be required for channel  
89 activation. Certain mutations of M1 residues that line the pore create constitutively active channels  
90 but these channels have reduced selectivity for Ca<sup>2+</sup> in comparison to STIM-activated Orai, which  
91 suggests that their pores have non-native conformations (Beth A McNally, Somasundaram,

92 Yamashita, & Prakriya, 2012; Yamashita et al., 2017; Shenyuan L Zhang et al., 2011). The H134A  
93 mutation of human Orai1, on the other hand, does not line the pore and has been shown to generate  
94 an activated channel with hallmarks of STIM-activated Orai, which include its high selectivity for  $\text{Ca}^{2+}$   
95 (Frischauf et al., 2017). We introduced the corresponding amino acid substitution into *Drosophila*  
96 Orai (H206A), confirmed that it generates a constitutively active channel, and determined its X-ray  
97 structure. The structure reveals a dilated pore and conformational changes in cytosolic “latch”  
98 regions that must be released for the pore to open. In another set of experiments, we determined  
99 structures of the wild type channel and of a mutant that corresponds to one that causes immune  
100 deficiency in humans. These structures reveal an “intermediate” conformation that is in between the  
101 quiescent and opened conformations. We used additional experiments to address ion binding in the  
102 open pore that provide insight into  $\text{Ca}^{2+}$ -selectivity and block by trivalent lanthanides. Together, the  
103 studies reveal mechanisms for pore opening and closing and give insight into the basis of store-  
104 operated  $\text{Ca}^{2+}$  entry.

## 105 **Results**

### 106 ***Activity of H206A Orai***

107 Orai from *Drosophila melanogaster* (hereafter referred to as Orai) was selected for functional and  
108 structural studies on the basis of its good biochemical stability (Hou et al., 2012). Purified Orai  
109 containing the H206A mutation (H206A Orai<sub>cryst</sub>), which corresponds to the H163A gain-of-function  
110 mutation of human Orai1, was studied in proteoliposomes to assess channel activity (Figure 2). The  
111 H206A Orai<sub>cryst</sub> construct is analogous to the one used to obtain the structure of the quiescent  
112 conformation, corresponds to the conserved region of Orai, and contains the regions necessary for  
113 activation by STIM (Li et al., 2007). Studying purified H206A Orai<sub>cryst</sub> in proteoliposomes under

114 divalent-free conditions, under which ionic currents through CRAC channels are more easily observed  
115 due to greater conductance of monovalent cations (e.g. Na<sup>+</sup> or K<sup>+</sup>) than Ca<sup>2+</sup> (Lepple-Wienhues &  
116 Cahalan, 1996; Prakriya & Lewis, 2006), we observed robust K<sup>+</sup> flux through the channel. Ion flux was  
117 not observed for empty vesicles or through a channel without the H206A mutation (WT Orai<sub>cryst</sub>), as is  
118 expected without activation (Figure 2B). Similar to wild type CRAC channels, K<sup>+</sup> flux was blocked by  
119 the addition of Gd<sup>3+</sup> (Figure 2C) (Yeromin et al., 2006). K<sup>+</sup> flux through H206A Orai<sub>cryst</sub> was also  
120 inhibited by the addition of Mg<sup>2+</sup> or Ca<sup>2+</sup> (Figure 2C), which is in accord with the properties exhibited  
121 by STIM-activated channels and indicative of the channel's selectivity for Ca<sup>2+</sup> (Lepple-Wienhues &  
122 Cahalan, 1996; Prakriya & Lewis, 2006). Thus, as has been shown for the corresponding H134A  
123 mutation of human Orai1 (Frischauf et al., 2017), H206A Orai<sub>cryst</sub> forms an open channel that  
124 recapitulates properties of STIM-activated Orai.

### 125 ***X-ray structure of H206A Orai<sub>cryst</sub> reveals an open conformation***

126 Obtaining X-ray structural information for Orai has been challenging and capturing an open  
127 conformation of the pore especially so. Extensive optimization of crystallization conditions improved  
128 the quality of H206A Orai<sub>cryst</sub> crystals from an initial diffraction limit of 20 Å resolution to 6.7 Å  
129 resolution. Despite the modest resolution of the optimized crystals, we were able to discern the  
130 conformation of the channel by calculating electron density maps using non-crystallographic  
131 symmetry averaging, which can be applied when there are multiple copies of the polypeptide in the  
132 crystallographic asymmetric unit (Bricogne, 1974). In this case, the asymmetric unit contains 24 Orai  
133 subunits, which are arranged as four complete channels. The 24-fold non-crystallographic symmetry  
134 allowed us to accurately determine the crystallographic phases and obtain electron density maps of  
135 excellent quality, which delineate all α-helices of the channel and resemble maps calculated using  
136 considerably higher resolution diffraction data (Figure 3A, B, Movie 1, Materials and Methods). All

137 four channels in the asymmetric unit adopt the same conformation. Since side chains are not visible  
138 in the maps we collected a highly redundant dataset using an X-ray wavelength ( $\lambda=1.7085 \text{ \AA}$ ) that was  
139 chosen to optimize the anomalous diffraction signal from endogenous sulfur atoms in order to locate  
140 methionine and cysteine residues within the protein (Table 1). Anomalous-difference electron-  
141 density peaks corresponding to these amino acids indicate both the validity of the atomic model and  
142 the accuracy of the crystallographic phases that were used to generate the electron density maps of  
143 the channel (Figure 3-figure supplement 1).

144 The X-ray structure of H206A Orai<sub>cryst</sub> reveals an open conformation of the channel (Figure 3).  
145 The open channel is comprised of a hexameric assembly of Orai subunits surrounding a single ion  
146 pore (Figure 3). The overall architecture of the channel is similar to the quiescent conformation, with  
147 each Orai subunit containing four transmembrane helices (M1-M4). The six M1 helices, one  
148 contributed by each subunit of the channel, form the walls of the open pore. Because the secondary  
149 structure of the polypeptide surrounding the pore is  $\alpha$ -helical, amino acid side chains on M1 establish  
150 the chemical environment along the pore. The pore is dramatically dilated on its cytosolic end,  
151 expanding by  $\sim 10 \text{ \AA}$  at Lys159, in comparison to the closed pore of Orai (Figure 4) (Hou et al., 2012).  
152 The differences in between the closed and open pores taper off toward the extracellular side such  
153 that, while subtle changes may occur, the location of the M1 helix at Glu178 is indistinguishable from  
154 the closed conformation at this resolution.

155 The conformational change in the pore results from an outward rigid body rotation of the M1-  
156 M4a portion of each subunit away from the central axis of the pore and a slight additional outward  
157 bend of M1 on its intracellular half (Figure 4A). The packing of M1-M4a within an individual subunit is  
158 nearly indistinguishable from the packing in the closed conformation (Figure 4B). The rigid body  
159 motion suggests that the amino acids on M1 that form the sides of the pore in the closed



160 conformation also do so in the open conformation (Figure 3B, 4A). We cannot discern if opening  
161 involves a slight ( $\sim 20^\circ$ ) rotation along the helical axis of M1, which has been suggested by  
162 electrophysiological studies using cysteine mutations (Yamashita et al., 2017). On the basis of the  
163 rigid body motion from the high-resolution structure of the quiescent conformation with a closed  
164 pore, the walls of the open pore would have four sections: a glutamate ring on the extracellular side  
165 that forms the selectivity filter (comprised of Glu178 residues from the six subunits), a  $\sim 15$  Å-long  
166 hydrophobic section, a  $\sim 15$  Å-long basic section, and cytosolic section (Figure 4A).

167 Residue 206 is located on the M2 helix and does not line the pore (Figure 3B). In the  
168 quiescent conformation, the wild type histidine at this position forms a hydrogen bond with the side  
169 chain of Ser165, which is located on the side of M1 facing away from the pore (Figure 4-figure  
170 supplement 1A) (Hou et al., 2012). On the basis of the current structure, a histidine could be  
171 accommodated in the open conformation without steric interference, suggesting that the  
172 conformation of the pore observed for H206A Orai<sub>cryst</sub> could be adopted by wild type Orai (e.g. when  
173 activated by STIM, Figure 4-figure supplement 1B). We surmise that subtle energetics involving the  
174 His206-Ser165 hydrogen bond contribute to stabilization of the closed pore and that interactions  
175 between these non-pore-lining regions of the channel influence pore opening, which is also in accord  
176 with previous studies (Frischauf et al., 2017). We postulate that the free-energy difference between  
177 the closed and open pore is on the order of a few hydrogen bonds.

### 178 ***Cation binding in the open pore***

179 To investigate potential binding sites for cations in the open pore that underlie Ca<sup>2+</sup>-selectivity and  
180 channel block by trivalent lanthanides, we collected X-ray diffraction data from crystals of H206A  
181 Orai<sub>cryst</sub> containing Gd<sup>3+</sup>, which blocks the channel from the extracellular side (Aussel, Marhaba,

182 Pelassy, & Breittmayer, 1996; Yeromin et al., 2006), and from crystals containing  $\text{Ba}^{2+}$ , which is a  
183 permeant surrogate for  $\text{Ca}^{2+}$  (Hoth, 1995) that is more easily identified crystallographically.  
184 Anomalous-difference electron density maps, which pinpoint the location of these ions, contained  
185 strong density for  $\text{Gd}^{3+}$  and for  $\text{Ba}^{2+}$  in the selectivity filter (Figure 5A,B). The electron density maps  
186 could represent one or two ions that directly coordinate the side chains of the glutamate ring (Glu178  
187 residues from the six subunits). The presence of  $\text{Ba}^{2+}$  and  $\text{Gd}^{3+}$  at this location provide evidence that  
188 the Glu178 side chains are oriented toward the pore when it is open.  $\text{Ca}^{2+}$ -binding in this region likely  
189 underlies Orai's high selectivity for  $\text{Ca}^{2+}$  under physiological conditions (e.g. extracellular  $[\text{Ca}^{2+}] \sim 2$   
190 mM). We hypothesize a selectivity mechanism that involves ion-ion interactions between two single-  
191 file  $\text{Ca}^{2+}$  ions (although the two sites may have different free energies and the electron density does  
192 not distinguish whether one or two ions are present). Block of the open channel by  $\text{Gd}^{3+}$  appears to  
193 occur by competitive binding with  $\text{Ca}^{2+}$ .

194 We showed previously that  $\text{Gd}^{3+}$ ,  $\text{Ba}^{2+}$  and  $\text{Ca}^{2+}$  bind near the glutamate ring when the pore is  
195 closed (Hou et al., 2012). While the positioning of  $\text{Gd}^{3+}$  is very similar between the open and closed  
196 pores, the positioning of  $\text{Ba}^{2+}/\text{Ca}^{2+}$  is noticeably different (Figure 5, Figure 5-figure supplement 1). In  
197 the closed pore, the  $\text{Ba}^{2+}/\text{Ca}^{2+}$  ion binds on the extracellular side of the selectivity filter,  
198 approximately 4 Å above the ring of glutamates, whereas in the open pore, the electron density is  
199 located within the glutamate ring rather than above it (Figure 5, Figure 5-figure supplement 1). The  
200 limits of the diffraction data prevent us from discerning differences in the atomic positions of the  
201 glutamate residues between the open and closed pores but the apparent repositioning of  $\text{Ba}^{2+}$  is an  
202 indication that subtle changes occur within the selectivity filter when the pore opens. Subtle changes  
203 at the extracellular side of the pore have also been suggested by spectroscopic and  
204 electrophysiological studies when Orai is activated by STIM (Gudlur et al., 2014; Beth A McNally et al.,

205 2012). We conclude that the transition in the pore between non-conductive and conductive  
206 conformations involves conformational changes along the length of the pore that introduce  
207 functionally important free-energy differences. These are most structurally pronounced at the  
208 cytoplasmic side but extend energetically to the selectivity filter on the extracellular side.

### 209 ***Anion binding in the open pore***

210 The basic region of the pore is highly unusual for a cation channel. We have shown previously that  
211 the basic region of the closed pore binds anions and an iron complex that co-purifies with the channel  
212 (Hou et al., 2012). Anomalous difference electron density for iron is not observed in the open pore,  
213 suggesting that the iron complex has been displaced. This is in accord with the dramatic widening of  
214 the pore in the basic region. To investigate whether anions might bind in the basic region in the open  
215 pore, and to assess if the basic amino acids contribute to the walls of the open pore, we collected  
216 diffraction data from H206A Orai<sub>cryst</sub> that was crystallized in iodide (I<sup>-</sup>). I<sup>-</sup> has similar properties to the  
217 cellularly abundant Cl<sup>-</sup> anion and would be identifiable by its anomalous X-ray scattering. We  
218 observed robust anomalous difference electron density for I<sup>-</sup> that is centrally located within the basic  
219 region of the open pore (Figure 5C). The presence of I<sup>-</sup> there provides evidence that the basic amino  
220 acids are exposed to the pore and that anion(s) can bind in the basic region when it is open. We  
221 suspect that a few anions would coat the sides of the basic region in a cellular context. In the open  
222 conformation, the basic region is large enough to accommodate a centrally located Ca<sup>2+</sup> ion that is  
223 surrounded by anions and/or water molecules. (The C $\alpha$  positions of Lys<sup>159</sup> residues on opposite sides  
224 of the pore are ~24 Å apart). We hypothesize that cellular anions may shield the positive charge of  
225 the basic residues during the permeation of Ca<sup>2+</sup> through the open pore.

## 226 ***Mutation of the basic region***

227 Because the basic region undergoes substantial dilation when it opens and because the eighteen  
228 basic residues (three residues from each of the six subunits) that form the walls of the pore are  
229 conserved as lysine or arginine among Orai channels, we wondered whether we could create a  
230 constitutively open channel by mutation of the residues. We substituted all three basic residues with  
231 serine (R155S, K159S, K163S) and studied the purified channel (designated SSS Orai<sub>cryst</sub>) in  
232 proteoliposomes using an assay to measure Na<sup>+</sup> flux under divalent-free conditions (Figure 6). We  
233 chose serine because it is a small hydrophilic residue that would eliminate positive charge from this  
234 region and because the R91S mutation of human Orai1 (corresponding to K163S in Orai) forms a  
235 functional channel when expressed with STIM1 (Derler et al., 2009). We did not detect flux through  
236 SSS Orai<sub>cryst</sub>, suggesting that is not constitutively open. As a control, we observed Na<sup>+</sup> flux through  
237 purified channels containing the V174A mutation of the hydrophobic region of the pore, which has  
238 previously been shown to produce leaky channels with diminished selectivity for Ca<sup>2+</sup> (Figure 6) (Hou  
239 et al., 2012; Beth A McNally et al., 2012). We hypothesize that the modest widening of the  
240 hydrophobic region that accompanies the dramatic dilation of the basic region is critical for ion  
241 permeation through the open pore.

## 242 ***Conformation of M4 and M4-ext***

243 Other differences between the quiescent and open conformations are changes in the conformations  
244 of the M4 and M4-ext helices. In the quiescent conformation, M4 and M4-ext form three helical  
245 segments: M4a and M4b, delineated by a bend in M4 at Pro288 near the midpoint of the membrane,  
246 and M4-ext, which follows a bend in a Ser306-His307-Lys308 (“SHK”) motif between M4b and M4-ext  
247 (Figure 1A). In the quiescent conformation, the M4-ext helices pair with one another through an

248 antiparallel coiled-coil interaction (Figure 1A). In the H206A Orai<sub>cryst</sub> structure, M4b and M4-ext are  
249 repositioned by straightenings of both bends such that the regions corresponding to M4a, M4b and  
250 M4-ext of each subunit form a continuous  $\alpha$ -helix that traverses the membrane and extends  $\sim 45$  Å  
251 into the cytosolic space (Figure 3B,D and Figure 4A). The straightening of M4/M4-ext identifies the  
252 Pro288 residue and the SHK motif, both of which are conserved in Orai channels, as hinge points.

### 253 ***X-ray structures of an intermediate conformation***

254 In the crystal of H206A Orai<sub>cryst</sub>, the cytosolic sides of two channels face one another and the M4-ext  
255 helices of different channels interact through anti-parallel coiled-coils that are analogous to the  
256 pairing of M4-ext helices between adjacent subunits in the quiescent conformation (Figure 7A, Figure  
257 7-figure supplement 1). To exclude the possibility that the crystal contacts in the H206A Orai<sub>cryst</sub>  
258 structure were responsible for the conformational changes we observed in the pore, we determined  
259 the structures wild-type (WT) Orai<sub>cryst</sub> and K163W Orai<sub>cryst</sub> grown in the same crystal form ( $I4_1$ ). The  
260 K163W mutation corresponds to the R91W in human Orai1 loss of function mutation that causes a  
261 severe combined immune deficiency-like disorder (Feske et al., 2006). Well-defined electron density  
262 maps of WT and K163W Orai<sub>cryst</sub> were obtained using non-crystallographic symmetry averaging of  
263 modest (6.9 and 6.1 Å, respectively) resolution diffraction data in the same manner as for the H206A  
264 Orai<sub>cryst</sub> structure (Figure 8A,B). Anomalous-difference electron density for sulfur atoms of  
265 methionine and cysteine residues in WT Orai<sub>cryst</sub> confirms the accuracy of the atomic model (Figure  
266 8E). We also obtained crystals of K163W Orai<sub>cryst</sub> in a  $P4_22_12$  crystal form that diffracted X-rays to  
267 4.35 Å resolution, which assisted with model building and was indistinguishable from the  $I4_1$   
268 structures of WT and K163W Orai<sub>cryst</sub> (Figure 8-figure supplement 1, and Table 2). Although the  
269 structures of WT and K163W Orai<sub>cryst</sub> reveal analogous straightening of M4/M4-ext (Figure 8 and  
270 Figure 7), the pores are closed and indistinguishable from the pore in the structure of the quiescent

271 conformation (Figure 8B,D) (Hou et al., 2012). Therefore, contacts within the crystal and the  
272 straightening of M4/M4-ext are not responsible for opening the pore. We hypothesize that  
273 additional energy would be required for the wild type pore to open, and this could be provided by the  
274 binding of STIM.

275         The structures of WT and K163W Orai<sub>cryst</sub> resemble to be an “intermediate” because their  
276 pores are closed like the quiescent conformation and their M4/M4-ext regions are like those  
277 observed in the open conformation. In this intermediate conformation, the M1-M4a portions of the  
278 channel adopt indistinguishable conformations relative to the quiescent conformation (Figure 8D). As  
279 such, the dimensions and chemical nature of the pore appear unchanged from the quiescent  
280 conformation. As in the quiescent conformation, anomalous difference electron density for an iron  
281 complex is observed in the basic region of the pore in the structures of the intermediate  
282 conformation (Figure 8B, Figure 8-figure supplement 1C). The density is positioned roughly in the  
283 center of the basic region in the structure of WT Orai<sub>cryst</sub> and located in the lower portion of it in the  
284 structures of the K163W mutant, which removes the top ring of basic residues from the pore (Figure  
285 8B, Figure 8-figure supplement 1C). The K163W mutation has no other apparent effect on the  
286 intermediate conformation, and this is analogous to observations from structures of the quiescent  
287 conformation with and without the K163W mutation (Hou et al., 2012). The presence of the  
288 anomalous density in the basic region for both the quiescent and intermediate conformations is  
289 another indication that the pores share the same closed conformation. Because the quiescent and  
290 intermediate conformations have been obtained using nearly identical protein constructs (differing  
291 only by two amino acid substitutions in the hyper variable extracellular M3-M4 loop, Materials and  
292 Methods), we suspect that there is an equilibrium between bent and unbent conformations of

293 M4/M4-ext. The molecular constraints of crystallization may bias the equilibrium, and STIM binding  
294 may do so in a cellular context.

295 ***Unlatching of M4b/M4-ext is necessary for pore opening.***

296 Comparison of the structures of the quiescent, intermediate and open conformations indicates that  
297 the M4b and M4-ext regions must undergo conformational changes from the quiescent conformation  
298 for the pore to open. In the quiescent conformation, the three sets of paired M4-ext helices create  
299 an assembly surrounding the intracellular side of the channel (Figure 1A). Bends at Pro288 and in the  
300 SHK motif are necessary for this configuration. Because of the bend at P288, M4b interacts with M3  
301 (Figure 1A, Figure 9A). In the open structure, the interaction between M4b and M3 is no longer  
302 present due to the repositioning of M4b that is enabled by unbending at Pro288 and the unpairing of  
303 M4-ext helices (Figure 9C). If the interaction between M4b and M3 of the quiescent conformation  
304 were present, or if the M4-ext helices were paired, the rigid body motion of M1-M4a that underlies  
305 pore opening could not occur due to steric interference between M3 and M4b (Figure 9D). We  
306 conclude that the paired M4-ext helices and the concomitant interactions between M4b and M3 of  
307 the quiescent conformation constitute “latches” that must be released for the pore to open. In belt-  
308 like fashion, the latches constrain the outer diameter of the intracellular portion of the channel and  
309 prevent the widening observed for the open pore. Thus, when the latches are fastened they stabilize  
310 the pore in a closed conformation. Complete straightening of the P288 and SHK bends, like what is  
311 captured in the structures of H206A, WT, and K163W Orai<sub>cryst</sub> presented here, may not be necessary  
312 for the pore to open because there could be enough space for pore dilation without complete  
313 straightening. The hinges may provide flexibility to the M4b and M4-ext helices when the latches are  
314 released. We hypothesize that the straightened conformations of the M4/M4-ext helices in the  
315 crystal structures are one conformation of these mobile regions along a continuum of unlatched

316 conformations that would permit, and necessarily precede, the opening of the pore. The structures  
317 of the intermediate conformation reveal that release of the latches does not necessarily open the  
318 pore: the pore is closed despite the M4b and M4-ext helices adopting the same conformation that  
319 they do in the open conformation. Thus, while necessary, unlatching is not sufficient to open the  
320 pore.

321 In a cellular context, mutations that cause release of the latches, that is, those that destabilize  
322 the quiescent conformation and/or favor straightening of the M4/M4-ext helices, may appear as  
323 activating mutations. Congruently, Pro245 of human Orai1, which corresponds to Pro288 of Orai, has  
324 been characterized as a residue that helps stabilize a closed state of the channel - mutation to any  
325 other residue, which would favor straightening of the bend at this position, has an activating  
326 phenotype (Nesin et al., 2014; Palty, Stanley, & Isacoff, 2015). Further, certain mutations of human  
327 Orai1 within and around the SHK hinge also create active channels (Zhou et al., 2016). Because  
328 unlatching is necessary, but not sufficient, to open the pore, these mutations may increase the  
329 probability that the channel is open in the absence of STIM and/or they may increase the binding  
330 affinity for STIM.

### 331 **Discussion**

332 Studies have shown that the M4-ext region of Orai interacts with a cytosolic portion of STIM that has  
333 a propensity to form coiled-coils (Kawasaki, Lange, & Feske, 2009; Li et al., 2007; Muik et al., 2008;  
334 Park et al., 2009; Yang, Jin, Cai, Li, & Shen, 2012). Mutation of the residues corresponding to Ile316  
335 and Leu319 of human Orai1, which mediate the coiled-coil packing in the crystal structures, prevents  
336 the interaction of Orai1 with STIM1 and subsequent channel activation (L273S and L276D mutations  
337 of human Orai1) (Muik et al., 2008; Navarro-Borelly et al., 2008). In accord with the unlatching we



338 observe, an additional body of evidence suggests that the M4-ext helices undergo conformational  
339 changes that lead to channel activation (Navarro-Borelly et al., 2008; Palty, Fu, & Isacoff, 2017;  
340 Tirado-Lee, Yamashita, & Prakriya, 2015; Zhou et al., 2016). One possible mechanism of STIM binding  
341 is that unlatching would expose the M4-ext regions and make them available for interaction with  
342 STIM. Our observation that unlatching does not necessarily open the pore is consistent with studies  
343 indicating that STIM1 can bind to loss-of-function mutants of human Orai1 that have constitutively  
344 closed pores, such as the pore-lining R91W mutant (Derler et al., 2009; B. A. McNally,  
345 Somasundaram, Jairaman, Yamashita, & Prakriya, 2013). Congruently, we observe that the  
346 corresponding K163W mutant of *Drosophila* Orai can adopt an unlatched conformation without  
347 opening of the pore.

348         While the most pronounced structural differences between the closed and open pores are  
349 within the basic region, we find that removal of the basic region by mutation does not form a  
350 constitutively open channel. On the other hand, mutations within the hydrophobic region of the pore  
351 (e.g. F99C or V102A of human Orai1 or V174A of Orai) give rise to leaky channels, albeit with  
352 diminished selectivity for  $\text{Ca}^{2+}$  (Figure 8) (Hou et al., 2012; Beth A McNally et al., 2012; Yamashita et  
353 al., 2017). We hypothesize that the modest widening of the hydrophobic region observed in the  
354 open conformation, which accompanies the dramatic dilation of the basic region, is critical for ion  
355 permeation and that the hydrophobic region functions as a “gate” – a variable constriction that  
356 prevents or permits ion conduction. This hypothesis is consistent with the observation that  
357 hydrophobic substitutions of the upper basic residue (R91W in human Orai1 or K163W in Orai) create  
358 constitutively closed channels because hydrophobic packing in the basic region would likely prevent  
359 the dilation of the opened pore. Both structural and functional analyses point to the conclusion that

360 while the conformational changes in the pore are more dramatic on the cytosolic side, they also  
361 extend to the extracellular side.

362 Ion binding in the open pore suggests that direct coordination of  $\text{Ca}^{2+}$  by the ring of Glu178  
363 residues in the selectivity filter is responsible for the channel's exquisite selectivity for  $\text{Ca}^{2+}$ . The  
364 presence of a short selectivity filter, in this case just the single ring of glutamate residues,  
365 differentiates Orai from most other cation channels. Cation-selective channels that share a general  
366 architecture that was first identified by structure of the tetrameric potassium channel KcsA, which  
367 include voltage-dependent  $\text{K}^+$  channels, voltage-dependent  $\text{Ca}^{2+}$  channels, the  $\text{Ca}^{2+}$ -selective channel  
368 TRPV6, and voltage-dependent  $\text{Na}^+$  channels, have longer selectivity filter regions that typically  
369 involve multiple ion-binding sites arranged in single file (Doyle et al., 1998; Liao, Cao, Julius, & Cheng,  
370 2013; Morais-Cabral, Zhou, & Mackinnon, 2001; Payandeh, Scheuer, Zheng, & Catterall, 2011;  
371 Saotome, Singh, Yelshanskaya, & Sobolevsky, 2016; Tang et al., 2014; Wu et al., 2016). The presence  
372 of multiple ions in single file can provide ion-selectivity in the context of high conductivity of ions  
373 through the selectivity filter (Hille, 1992). Orai conducts  $\text{Ca}^{2+}$  very slowly in comparison to these  
374 channels, and its short selectivity filter may be one reason. In the physiological context of  
375 approximately 2 mM  $\text{Ca}^{2+}$  outside the cell, we hypothesize an ion-selectivity mechanism in which the  
376 selectivity filter toggles between having one and having two  $\text{Ca}^{2+}$  ions present. When one  $\text{Ca}^{2+}$  ion is  
377 bound, it would likely be centered within the glutamate ring. When two  $\text{Ca}^{2+}$  ions are present, the  
378 flexibility afforded by glutamate side chains may allow the ions to be positioned in single-file within  
379 the selectivity filter with one above the other. In this metastable state, the ion-ion repulsion would  
380 be sufficient to allow the lower  $\text{Ca}^{2+}$  ion to dissociate from the filter and move through the pore. The  
381 single  $\text{Ca}^{2+}$  ion remaining in the filter would not be easily displaced without the binding of a second  
382  $\text{Ca}^{2+}$ . The single  $\text{Ca}^{2+}$  ion, however, would block monovalent cations from permeating through the

383 filter. On the other hand, when  $\text{Ca}^{2+}$  is artificially stripped away using a chelator, monovalent cations  
384 could stream through the selectivity filter unimpeded. The proposed mechanism would explain why  
385 micromolar concentrations of  $\text{Ca}^{2+}$  block monovalent cations from permeating through the pore  
386 (Hoth & Penner, 1993; Lepple-Wienhues & Cahalan, 1996). And it would explain why millimolar  
387 concentrations of  $\text{Ca}^{2+}$  are needed for efficient  $\text{Ca}^{2+}$  conduction because a high concentration of  $\text{Ca}^{2+}$   
388 would favor transient binding of a second  $\text{Ca}^{2+}$  ion. Unlike the selectivity filters of most other cation  
389 channels that are designed for high ion-throughput, the selectivity filter of Orai may impose an  
390 energy barrier that impedes  $\text{Ca}^{2+}$  permeation. Other energy barriers that might serve to limit the flow  
391 of  $\text{Ca}^{2+}$  through the pore so as to not overwhelm the cell with  $\text{Ca}^{2+}$  include the narrow hydrophobic  
392 region and possible electrostatic repulsion by the basic region.

393         Comparison of the structures engenders a sequence for channel activation that proceeds from  
394 a quiescent state prior to interaction with STIM, through an unlatched intermediate, and culminates  
395 with an open pore (Figure 10, Movie 2). In the quiescent conformation, clasped latches constrain the  
396 outer cytosolic diameter of the channel and hold the pore closed. Unlatching, which could happen  
397 transiently and spontaneously, would expose cytosolic docking sites for STIM. The engagement of  
398 STIM, via molecular interactions that remain to be resolved, stabilizes an unlatched conformation and  
399 the widening of the pore that permits  $\text{Ca}^{2+}$  influx. The structures give insight into the remarkable  
400 molecular choreography by which Orai governs store-operated  $\text{Ca}^{2+}$  entry and a myriad of  
401 downstream cellular responses.

---

## 402 **Materials and Methods**

403 **Cloning, expression, purification and crystallization.** cDNA encoding *Drosophila melanogaster* Orai  
404 (amino acids 133-341) followed by a C-terminal YL½ antibody affinity tag (amino acids  
405 EGEEF)(Kilmartin, Wright, & Milstein, 1982) was cloned into the EcoRI and NotI restriction sites of the  
406 *Pichia pastoris* expression vector pPICZ-C (Invitrogen Life Technologies). Two non-conserved cysteine  
407 residues were mutated to improve protein stability (C224S and C283T). This construct, termed “WT  
408 Orai<sub>cryst</sub>”, differs from the one we used previously (Hou et al., 2012) only in that it contains wild type  
409 Pro276 and Pro277 residues in the hyper variable M3-M4 loop rather than arginine substitutions at  
410 these positions. Constructs bearing the H206A or K163W mutations were made on the background  
411 of WT Orai<sub>cryst</sub> using standard molecular biology techniques (designated “H206A Orai<sub>cryst</sub>” or “K163W  
412 Orai<sub>cryst</sub>”, accordingly). Transformations into *P. pastoris*, expression, and cell lysis were performed as  
413 previously described (Long, Campbell, & MacKinnon, 2005).

414 Lysed *P. pastoris* cells were re-suspended in buffer (3.3 ml buffer for each 1 g of cells) containing 150  
415 mM KCl, 10 mM sodium phosphate, pH 7.0, 0.1 mg/ml deoxyribonuclease I (Sigma-Aldrich), 1:1000  
416 dilution of Protease Inhibitor Cocktail Set III, EDTA free (CalBiochem), 1 mM benzamide (Sigma-  
417 Aldrich), 0.5 mM 4-(2-aminoethyl) benzenesulfonyl fluoride hydrochloride (Gold Biotechnology) and  
418 0.1 mg/ml soybean trypsin inhibitor (Sigma-Aldrich). Cell lysate was adjusted to pH 7.0 with 1 N KOH,  
419 0.11 g n-dodecyl-β-D-maltopyranoside (DDM, Anatrace, solgrade) per 1 g of cells was added to the  
420 cell lysate, and the mixture was stirred at room temperature for 45 minutes to extract Orai from the  
421 membranes. The sample was then centrifuged at 30,000 *g* for 45 min at 17°C and the supernatant  
422 was filtered (0.45 μm polyethersulfone membrane). YL½ antibody (IgG, expressed from hybridoma  
423 cells and purified by ion exchange chromatography) was coupled to CNBr-activated sepharose beads  
424 (GE Healthcare) according to the manufacturer’s protocol. Approximately 0.4 ml of beads were

425 added to the sample for each 1 g of *P. pastoris* cells and the mixture was rotated at room  
426 temperature for 1 h. Beads were collected on a column, washed with 5 column-volumes of buffer  
427 containing 150 mM KCl, 10 mM sodium phosphate, pH 7.0, 5 mM DDM, 0.1 mg/ml lipids (3:1:1 molar  
428 ratio of 1-palmitoyl-2-oleoyl-sn-glycero-3-phosphocholine, 1-Palmitoyl-2-oleoyl-sn-glycero-3-  
429 phosphoethanolamine, and 1-palmitoyl-2-oleoyl-sn-glycero-3-[phospho-rac-(1-glycerol)], obtained  
430 from Avanti) and eluted with buffer containing 150 mM KCl, 100 mM Tris-HCl, pH 8.5, 5 mM DDM, 0.1  
431 mg/ml lipids and 5 mM Asp-Phe peptide (Sigma-Aldrich). The eluted protein was concentrated to ~ 25  
432 mg/ml using a 100 kDa concentrator (Amicon Ultra, Millipore) and further purified on a Superdex-200  
433 gel filtration column (GE Healthcare) in 75 mM KCl, 10 mM Tris-HCl, pH 8.5, 0.1 mg/ml lipids, and  
434 detergent: 4 mM octyl glucose neopentyl glycol (Anatrace, anagrade) to obtain crystals of K163W  
435 Orai<sub>cryst</sub> in space group P4<sub>2</sub>2<sub>1</sub>2, or a mixture of 0.5 mM decyl maltose neopentyl glycol (Anatrace,  
436 anagrade) and 3 mM octyl glucose neopentyl glycol for crystals of WT and K163W Orai<sub>cryst</sub> in space  
437 group of I4<sub>1</sub>, and 0.5 mM decyl maltose neopentyl glycol for H206A Orai<sub>cryst</sub>. For crystals of H206A  
438 Orai<sub>cryst</sub>, 3 mM octyl glucose neopentyl glycol was added into the purified H206A Orai<sub>cryst</sub> just before  
439 setting up crystallization trials. A typical prep, utilizing 20 g of cells, yielded ~ 2 mg of purified Orai.  
440 For the crystals of H206A Orai<sub>cryst</sub> with I<sup>-</sup>, NaI was substituted in place of KCl in the purification  
441 buffers. For crystals of H206A in Ba<sup>2+</sup>, 5 mM BaCl<sub>2</sub> was added to the final purified protein before  
442 crystallization. Purified Orai proteins were concentrated to 10-20 mg/ml using 100 kDa Vivaspin-2  
443 concentrators (Sartorius Stedim Biotech), and mixed 1:1 (250 nl: 250 nl) with crystallization solutions  
444 for hanging drop vapor diffusion crystallization. Crystals of WT Orai<sub>cryst</sub> grew in 32-35% PEG 400 (v/v)  
445 and 0.1 M potassium phosphate pH 7.5. Crystals of K163W Orai<sub>cryst</sub> in space group P4<sub>2</sub>2<sub>1</sub>2 grew in 24-  
446 26% PEG 400 (v/v) and 0.2 M potassium phosphate pH 6.5. Crystals of K163W Orai<sub>cryst</sub> in space group  
447 I4<sub>1</sub> grew in 26-28% PEG 400 (v/v) and 150 mM NaCl and 100 mM N-2-hydroxyethylpiperazine-N-2'-

448 ethanesulfonic acid (HEPES) pH 7.5. Native crystals of H206A Orai<sub>cryst</sub> grew in 36-38% PEG400, 500  
449 mM NaCl and 100 mM Tris-HCl pH 9.0. The crystallization solution for H206A Orai<sub>cryst</sub> with NaI was 28-  
450 31% PEG400 and 100 mM Tris-HCl pH7.5. The crystallization solution for H206A Orai<sub>cryst</sub> with BaCl<sub>2</sub>  
451 was 32-34% PEG400, 500 mM NaCl and 100 mM Tris-HCl pH 8.5.

452 **Structure determination.** *Data collection and processing.* All crystals were dehydrated and cryo-  
453 protected before flash-cooling in liquid nitrogen by serial transfer into solutions containing the buffer  
454 components of an equilibrated crystallization drop and increasing concentrations of PEG 400 (to 50%  
455 w/v) in 9 steps with ~ 1 min intervals. For heavy atom derivatives, Crystals of K163W Orai<sub>cryst</sub>  
456 belonging to space group I4<sub>1</sub> were soaked in stabilization solution supplemented with ~18 µg/ml p-  
457 chloromercuribenzenesulfate (PCMB), or ~7 µg/ml di-µ-iodo-bis(ethylene-diamine)-di-platinum(II)  
458 nitrate (PIP) for 24 hours. For ion binding experiments, crystals of H206A Orai<sub>cryst</sub> were soaked in  
459 stabilization solution supplemented with 1 mM GdCl<sub>3</sub> for two days. After soaking, the crystals were  
460 cryo-protected in the same solutions as native crystals and flash-cooled. Crystals of H206A Orai<sub>cryst</sub>  
461 that contained 5 mM BaCl<sub>2</sub> were soaked in stabilization solution supplemented with 50 mM BaCl<sub>2</sub>  
462 during dehydration steps and flash-cooled. X-ray diffraction data sets were collected using  
463 synchrotron radiation and were indexed, integrated and scaled with the HKL suite (Otwinowski &  
464 Minor, 1997) or XDS (Kabsch, 2010). Resolution limits of the diffraction data were estimated from the  
465 CC<sub>1/2</sub> value (Karplus & Diederichs, 2012).

466 *K163W Orai<sub>cryst</sub> (P4<sub>2</sub>2<sub>1</sub>2 space group).* Initial phases for data collected from crystals of K163W Orai<sub>cryst</sub>  
467 belonging to space group P4<sub>2</sub>2<sub>1</sub>2, were determined by molecular replacement (MR) with  
468 PHENIX(Adams et al., 2010) using residues 148-288 of the structure of K163W *Drosophila* Orai in the  
469 quiescent conformation (PDB ID: 4HKS) as a search model. The asymmetric unit contains three Orai  
470 subunits; these form a complete hexameric channel by a two-fold rotational symmetry operator of

471 the  $P4_22_12$  space group. To improve the phases and reduce bias, the phases were improved with  
472 solvent flattening, histogram matching, and 3-fold non-crystallographic symmetry (NCS) averaging  
473 with the program DM(Cowtan, 1994). This yielded well-defined density for the channel (Figure 8-  
474 figure supplement 1). A B-factor sharpening value of  $-150 \text{ \AA}^2$  was applied to the electron density  
475 maps that are displayed (Figure 3, Figure 8, and Figure 8-figure supplement 1). The atomic model  
476 was adjusted in COOT (Emsley, Lohkamp, Scott, & Cowtan, 2010) and refined in CNS using a  
477 deformable elastic network (DEN) force field (Brünger et al., 1998; Brunger et al., 2012; Schröder,  
478 Brunger, & Levitt, 2007; Schröder, Levitt, & Brunger, 2010) and in PHENIX with NCS and secondary  
479 structure restraints. The final model contains residues 148-327 of Orai, excluding the following  
480 residues that did not have well-enough defined electron density to direct model building: 181-188  
481 (the M1-M2 loop), 220-239 (the M2-M3 loop), and 314-327 of subunit B.

482 *K163W Orai<sub>cryst</sub> (I4<sub>1</sub> space group)*. Initial phases for K163W Orai<sub>cryst</sub> in space group  $I4_1$  were  
483 determined experimentally by the MIRAS (multiple isomorphous replacement with anomalous  
484 scattering) method using a native dataset and two derivative ones (PCMB and PIP) using  
485 SHARP(Vonrhein, Blanc, Roversi, & Bricogne, 2007) (Table 2; Figure 8-figure supplement 1E)). The  
486 asymmetric unit contains four hexameric channels (twenty four Orai subunits) for which density was  
487 apparent following solvent flattening with the program DM (Cowtan, 1994). The phases were  
488 improved and extended to  $6.1 \text{ \AA}$  resolution using solvent flattening, histogram matching, and 24-fold  
489 NCS averaging with DM. This yielded continuous densities for all helices in all 24 Orai subunits within  
490 the asymmetric unit (Figure 8-figure supplement 1A). Anomalous-difference electron density maps of  
491 well-ordered platinum and mercury sites at Met321 and Cys215, respectively, helped establish the  
492 amino acid register. The quiescent conformation structure (PDB ID: 4HKS; determined at  $3.35 \text{ \AA}$ ) was  
493 used as a reference for modeling of the M1-M3 portion and the  $4.35 \text{ \AA}$  structure in space group

494 P4<sub>2</sub>2<sub>1</sub>2 was used for M4/M4-ext. Minor adjustments of the M4 and M4-ext helices were made as  
495 necessary. Refinement was done using rigid body and DEN refinement in CNS utilizing NCS, helical  
496 secondary structure (backbone phi, psi) and phase restraints (Brünger et al., 1998; Brunger et al., 2012;  
497 Schröder et al., 2007; Schröder et al., 2010). Grouped B-factor and TLS refinement were performed  
498 (in PHENIX), for which each of the four channels was defined as a group, as is appropriate for modest-  
499 resolution data. The final model contains residues 148-327 of Orai, excluding the following residues  
500 that did not have well-enough defined electron density to direct model building: 181-188 (the M1-M2  
501 loop) and 220-239 (the M2-M3 loop).

502 WT Orai<sub>cryst</sub> (I4<sub>1</sub> space group). Initial phases for the structure of WT Orai<sub>cryst</sub> were determined by MR  
503 using the K163W Orai<sub>cryst</sub> structure (space group I4<sub>1</sub>) as an initial model in the program PHENIX  
504 (Adams et al., 2010). Diffraction data were collected to maximize the anomalous scattering from iron  
505 ( $\lambda = 1.738 \text{ \AA}$ ). Single-wavelength anomalous diffraction (SAD) phases derived from the anomalous  
506 density (presumably from iron) in the basic region of the pore were combined with the molecular  
507 replacement phases (MR-SAD method) using AutoSol of PHENIX (Adams et al., 2010). Potential phase  
508 bias was further minimized by density modification with solvent flattening, histogram matching, and  
509 24-fold NCS averaging using the program DM (Cowtan, 1994). Model building was aided by the  
510 quiescent conformation (PDB ID: 4HKR; 3.35  $\text{\AA}$  resolution) and by the 4.35  $\text{\AA}$  resolution structure of  
511 K163W Orai<sub>cryst</sub> from the P4<sub>2</sub>2<sub>1</sub>2 space group. Minor adjustments of the M4-ext helices were made in  
512 COOT (Emsley et al., 2010). Refinement was done using rigid body and DEN refinement in CNS  
513 (Brünger et al., 1998; Brunger et al., 2012; Schröder et al., 2007; Schröder et al., 2010). During  
514 refinement, NCS, helical secondary structure (backbone phi, psi) and experimental phase restraints  
515 were applied. Grouped B-factor and TLS refinement were performed (in PHENIX), for which each of  
516 the four channels was defined as a group. The final model contains residues 148-327 of Orai,



517 excluding the following residues that did not have well-enough defined electron density to direct  
518 model building: 181-191 (the M1-M2 loop) and 220-239 (the M2-M3 loop).

519 H206A Orai<sub>cryst</sub> (I4<sub>1</sub> space group). Initial phases for the structure of H206A Orai<sub>cryst</sub> were obtained with  
520 MR using a truncated structure (amino acids 148-309) of WT Orai<sub>cryst</sub> (I4<sub>1</sub> space group) as a search  
521 model in PHENIX. At this stage electron density maps contained broken density for the four channels  
522 in the asymmetric unit. These phases were used to identify four Gd<sup>3+</sup> sites (one site in the glutamate  
523 ring of each channel in the ASU) from the dataset collected from a crystal soaked in GdCl<sub>3</sub> (Table 1)  
524 and the phases were improved using the MR-SAD method (using AutoSol in PHENIX). The phases  
525 were then improved using solvent flattening, histogram matching, and four-fold non-crystallographic  
526 symmetry (NCS) averaging with the program DM(Cowtan, 1994) using an entire channel as the  
527 reference region for NCS averaging. This yielded continuous electron density for helices. These  
528 phases were used as starting phases for the native dataset and were improved and extended to 6.7 Å  
529 resolution using the 24-fold NCS present within the asymmetric unit. For the 24-fold averaging, a  
530 single Orai subunit corresponding to amino acids 148-309 was used as the reference region (with  
531 solvent flattening, histogram matching, and NCS averaging performed in DM). This map (shown in  
532 Figure 3A,B) was used to direct model building. The initial model was generated by rigid body fit of  
533 WT Orai<sub>cryst</sub> subunits and adjusted manually in COOT (e.g. to account for the additional bend in  
534 M1)(Emsley et al., 2010). Side chain conformations cannot be determined from the electron density  
535 due to the limit of the diffraction data; side chains are included in the atomic model for reference,  
536 however, and their conformations are based on those observed in the quiescent conformation (PDB  
537 4HKR) for amino acids in M1-M4a and those from the 4.35 Å resolution structure presented here  
538 (P4<sub>2</sub>2<sub>1</sub>2 space group of K163W Orai<sub>cryst</sub>) for amino acids in M4b and M4-ext. Helical regions were  
539 modeled with ideal α-helical geometry and side chain rotamers were selected from frequently

540 occurring conformations (Hintze, Lewis, Richardson, & Richardson, 2016) and to minimize steric  
541 clashes (Word et al., 1999). Refinement was done using rigid body and DEN refinement in CNS  
542 utilizing NCS and helical secondary structure (backbone phi, psi) restraints (Brünger et al., 1998;  
543 Brunger et al., 2012; Schröder et al., 2007; Schröder et al., 2010). Grouped B-factor and TLS  
544 refinement were performed (in PHENIX), for which each of the four channels was defined as a group.  
545 Highly redundant data allowed us to visualize anomalous-difference electron density arising from the  
546 sulfur atoms of methionine or cysteine residues on each of the M1-M4 helices and on the M4-ext  
547 helix (Table 1). These anomalous peaks confirm the assigned amino acid register and indicate the  
548 accuracy of the crystallographic phases (Figure 3-figure supplement 1). The model contains residues  
549 148-327 of Orai, excluding the following residues that did not have well-enough defined electron  
550 density to direct model building: 181-191 (the M1-M2 loop) and 220-239 (the M2-M3 loop).

551 Anomalous-difference electron density maps for ion experiments. Phases for the three anomalous-  
552 difference electron density maps in Figure 5 (Table 1) were determined by MR-SAD (Phenix, using  
553 H206A Orai<sub>cryst</sub> for MR and the anomalous signal from ions), and were improved by 24-fold NCS  
554 averaging, solvent flattening and histogram matching in DM. Anomalous difference electron density  
555 for each ion was observed, with approximately the same sigma level and position, in all four channels  
556 of each asymmetric unit.

557 **Reconstitution and flux assay.** Orai constructs were purified and reconstituted into lipid vesicles  
558 using a modified published procedure (Hou et al., 2012). A lipid mixture containing 15 mg/ml POPE (1-  
559 palmitoyl-2-oleoyl-sn-glycero-3-phosphocholine) and 5 mg/ml POPG (1-palmitoyl-2-oleoyl-sn-glycero-  
560 3-phospho(1'-rac-glycerol)) was prepared in water and solubilized with 8% (w/vol) n-decyl-β-D-  
561 maltopyranoside. Purified WT or H206A Orai<sub>cryst</sub> protein was mixed with the solubilized lipids to  
562 obtain a final protein concentration of 0.5 mg/ml and a lipid concentration of 10 mg/ml. Detergent

563 was removed by dialysis (15 kDa molecular weight cutoff) at 4 °C for 7 days against a reconstitution  
564 buffer containing 10 mM HEPES pH 7.0, 150 mM KCl and 0.2 mM ethylene glycol tetraacetic acid  
565 (EGTA), with daily buffer exchanges and utilizing a total volume of 14 l of reconstitution buffer. The  
566 reconstituted sample was sonicated (~30 sec), aliquoted, flash-frozen in liquid nitrogen and stored at  
567 -80 °C.

568 Vesicles were rapidly thawed (using 37 °C water bath), sonicated for 5 sec, incubated at room  
569 temperature for 2-4 hours before use, and then diluted 100-fold into a flux assay buffer containing  
570 150 mM n-methyl-d-glucamine (NMDG), 10 mM HEPES pH 7.0, 0.2 mM EGTA, 0.5 mg/mL bovine  
571 serum albumin and 0.2 μM 9-amino-6-chloro-2-methoxyacridine (ACMA, from a 2 mM stock in  
572 DMSO). Data were collected on a SpectraMax M5 fluorometer (Molecular Devices) using Softmax Pro  
573 5 software. Fluorescence intensity measurements were collected every 30 sec over the span of the  
574 1200 sec experiment (excitation and emission set to 410 nm and 490 nm, respectively). The proton  
575 ionophore carbonyl cyanide m-chlorophenyl hydrazine (CCCP, 1 μM from a 1 mM stock in DMSO) was  
576 added after 150 sec and the sample was mixed briefly by pipette. The potassium ionophore  
577 valinomycin (2 nM from a 2 μM stock in DMSO) was added at the end of the experiment (990 sec) to  
578 establish a baseline fluorescence and confirm vesicle integrity. For experiments used to determine  
579 the effects of Ca<sup>2+</sup>, Mg<sup>2+</sup> or Gd<sup>3+</sup> on H206A Orai<sub>cryst</sub>, CaCl<sub>2</sub> (1 mM final concentration), MgCl<sub>2</sub> (3 mM  
580 final concentration), or GdCl<sub>3</sub> (0.1 mM final concentration) was added to aliquots of reconstituted  
581 vesicles. To introduce the ions into the vesicles, these vesicles were sonicated for 5 sec, frozen in  
582 liquid nitrogen, thawed, sonicated a second time for 5 sec, and incubated at room temperature for 2-  
583 4 hours prior to measurements. The flux assay buffers were supplemented with 1 mM CaCl<sub>2</sub>, 3 mM  
584 MgCl<sub>2</sub>, or 0.1 mM GdCl<sub>3</sub>, respectively, for these experiments.

585 Flux experiments using V174A Orai<sub>cryst</sub> and Orai bearing the simultaneous R155S, K159S, and K163S  
586 mutations (SSS Orai<sub>cryst</sub>) were performed analogously. In these experiments Na<sup>+</sup> flux was measured  
587 under divalent-free conditions as described (Hou et al., 2012). Purified protein was prepared as  
588 described above. Proteoliposomes, or liposomes without protein, were formed by dialysis against 10  
589 mM HEPES, pH 7.0, 150 mM NaCl and 0.2 mM EGTA, and were aliquoted, flash-frozen in liquid  
590 nitrogen and stored at -80 °C until use. For reconstitution, the lipid concentration was 10 mg/ml  
591 POPE:POPG (3:1 weight ratio) and the protein concentrations were 1 mg/ml and 0.01 mg/ml for SSS  
592 Orai<sub>cryst</sub> and V174A Orai<sub>cryst</sub>, respectively. (0.1 and 0.01 mg/ml SSS Orai<sub>cryst</sub> concentrations were also  
593 tested and gave indistinguishable results.) Liposome samples were diluted 50-fold into flux buffer  
594 containing 10 mM HEPES pH 7.0, 0.2 mM EGTA, 0.5 mg/mL bovine serum albumin, 0.2 μM ACMA, and  
595 150 mM N-methyl-D-glucamine (NMDG), which established a Na<sup>+</sup> gradient. After stabilization of the  
596 fluorescence signal (150 sec), 1 μM CCCP was added to the sample. The Na<sup>+</sup> ionophore monensin  
597 was added after 990 sec to render all vesicles permeable to Na<sup>+</sup> and establish the minimum baseline  
598 fluorescence.

599 **Acknowledgments:** We thank Richard Hite, Christopher Lima, Nikola Pavletich, and members of the  
600 Long laboratory for discussions and comments on the manuscript. This work was supported by NIH  
601 Grant R01 GM094273 (to S.B.L.) and a core facilities support grant to Memorial Sloan Kettering  
602 Cancer Center (P30 CA008748). Synchrotron radiation facilities were supported by NIH Grants ACB-  
603 12002, AGM-12006, P41 GM103403, and S10 RR029205, under Department of Energy Contract DE-  
604 AC02-06CH11357. Atomic coordinates, structure factors, and crystallographic phases have been  
605 deposited in the Protein Data Bank with accession numbers 6BBF (H206A Orai<sub>cryst</sub>), 6BBG (WT  
606 Orai<sub>cryst</sub>), 6BBH (K163W Orai<sub>cryst</sub>, I4<sub>1</sub> form), and 6BBI (K163W Orai<sub>cryst</sub>, P4<sub>2</sub>2<sub>1</sub>2 form).

607 **Author Contributions:** X.H. and S.B. expressed, purified and crystallized proteins, and performed  
608 functional assays. All authors contributed to experimental design. X.H. determined structures. S.B.L.  
609 and X.H. prepared the manuscript.

610 **Competing Interests:** The authors have no competing interests.

## 611 **References**

- 612 Adams, P. D., Afonine, P. V., Bunkóczi, G., Chen, V. B., Davis, I. W., Echols, N., . . . Zwart, P. H. (2010).  
613 PHENIX: a comprehensive Python-based system for macromolecular structure solution.  
614 *Acta Cryst, D66*, 213-221.
- 615 Aussel, C., Marhaba, R., Pelassy, C., & Breittmayer, J. P. (1996). Submicromolar La<sup>3+</sup>  
616 concentrations block the calcium release-activated channel, and impair CD69 and CD25  
617 expression in CD3- or thapsigargin-activated Jurkat cells. *The Biochemical journal*, *313* ( Pt  
618 3), 909-913.
- 619 Bricogne, G. (1974). Geometric Sources of Redundancy in Intensity Data and Their Use for Phase  
620 Determination. *Acta Crystallographica Section A*, *A 30*(May1), 395-405. doi:Doi  
621 10.1107/S0567739474010722
- 622 Brünger, A. T., Adams, P. D., Clorec, G. M., DeLano, W. L., Gros, P., Grosse-Kunstleve, R. W., . . .  
623 Warren, G. L. (1998). Crystallography & NMR System: A New Software Suite for  
624 Macromolecular Structure Determination. *Acta Cryst, D54*, 905-921.
- 625 Brunger, A. T., Adams, P. D., Fromme, P., Fromme, R., Levitt, M., & Schroder, G. F. (2012).  
626 Improving the accuracy of macromolecular structure refinement at 7 Å resolution.  
627 *Structure*, *20*(6), 957-966. doi:10.1016/j.str.2012.04.020
- 628 Cai, X., Zhou, Y., Nwokonko, R. M., Loktionova, N. A., Wang, X., Xin, P., . . . Gill, D. L. (2016). The  
629 Orai1 Store-operated Calcium Channel Functions as a Hexamer. *J Biol Chem*, *291*(50),  
630 25764-25775. doi:10.1074/jbc.M116.758813
- 631 Clapham, D. E. (2007). Calcium signaling. *Cell*, *131*(6), 1047-1058. doi:10.1016/j.cell.2007.11.028
- 632 Cowtan, K. D. (1994). 'dm': An automated procedure for phase improvement by density  
633 modification. *Joint CCP4 and ESF-EACBM Newsletter on Protein Crystallography*, *31*, 34-38.
- 634 Derler, I., Fahrner, M., Carugo, O., Muik, M., Bergsmann, J., Schindl, R., . . . Romanin, C. (2009).  
635 Increased hydrophobicity at the N terminus/membrane interface impairs gating of the  
636 severe combined immunodeficiency-related ORAI1 mutant. *The Journal of Biological*  
637 *Chemistry*, *284*(23), 15903-15915. doi:10.1074/jbc.M808312200

- 638 Doyle, D. A., Morais Cabral, J., Pfuetzner, R. A., Kuo, A., Gulbis, J. M., Cohen, S. L., . . . Mackinnon, R.  
639 (1998). The structure of the potassium channel: molecular basis of K<sup>+</sup> conduction and  
640 selectivity. *Science (New York, NY)*, *280*(5360), 69-77.
- 641 Emsley, P., Lohkamp, B., Scott, W. G., & Cowtan, K. (2010). Features and development of Coot.  
642 *Acta Crystallogr D Biol Crystallogr*, *66*(Pt 4), 486-501. doi:10.1107/S0907444910007493
- 643 Feske, S., Gwack, Y., Prakriya, M., Srikanth, S., Puppel, S.-H., Tanasa, B., . . . Rao, A. (2006). A  
644 mutation in Orai1 causes immune deficiency by abrogating CRAC channel function.  
645 *Nature*, *441*(7090), 179-185. doi:10.1038/nature04702
- 646 Feske, S., Prakriya, M., Rao, A., & Lewis, R. S. (2005). A severe defect in CRAC Ca<sup>2+</sup> channel  
647 activation and altered K<sup>+</sup> channel gating in T cells from immunodeficient patients. *The*  
648 *Journal of experimental medicine*, *202*(5), 651-662. doi:10.1084/jem.20050687
- 649 Frischauf, I., Litvinukova, M., Schober, R., Zayats, V., Svobodova, B., Bonhenry, D., . . . Schindl, R.  
650 (2017). Transmembrane helix connectivity in Orai1 controls two gates for calcium-  
651 dependent transcription. *Sci Signal*, *10*(507). doi:10.1126/scisignal.aao0358
- 652 Gudlur, A., Quintana, A., Zhou, Y., Hirve, N., Mahapatra, S., & Hogan, P. G. (2014). STIM1 triggers a  
653 gating rearrangement at the extracellular mouth of the ORAI1 channel. *Nature*  
654 *communications*, *5*, 5164. doi:10.1038/ncomms6164
- 655 Hille, B. (1992). *Ionic channels of excitable membranes* (2nd ed.). Sunderland, Mass.: Sinauer  
656 Associates.
- 657 Hintze, B. J., Lewis, S. M., Richardson, J. S., & Richardson, D. C. (2016). Molprobit's ultimate  
658 rotamer-library distributions for model validation. *Proteins*, *84*(9), 1177-1189.  
659 doi:10.1002/prot.25039
- 660 Hogan, P. G., Lewis, R. S., & Rao, A. (2010). Molecular basis of calcium signaling in lymphocytes:  
661 STIM and ORAI. *Annual review of immunology*, *28*, 491-533.  
662 doi:10.1146/annurev.immunol.021908.132550
- 663 Hogan, P. G., & Rao, A. (2015). Store-operated calcium entry: Mechanisms and modulation.  
664 *Biochemical and Biophysical Research Communications*, *460*(1), 40-49.  
665 doi:10.1016/j.bbrc.2015.02.110
- 666 Hoth, M. (1995). Calcium and barium permeation through calcium release-activated calcium  
667 (CRAC) channels. *Pflügers Archiv - European Journal of Physiology*, *430*(3), 315-322.
- 668 Hoth, M., & Penner, R. (1992). Depletion of intracellular calcium stores activates a calcium  
669 current in mast cells. *Nature*, *355*(6358), 353-356. doi:10.1038/355353a0
- 670 Hoth, M., & Penner, R. (1993). Calcium release-activated calcium current in rat mast cells. *The*  
671 *Journal of Physiology*, *465*, 359-386.
- 672 Hou, X., Pedi, L., Diver, M. M., & Long, S. B. (2012). Crystal structure of the calcium release-  
673 activated calcium channel Orai. *Science (New York, NY)*, *338*(6112), 1308-1313.  
674 doi:10.1126/science.1228757

- 675 Kabsch, W. (2010). XDS. *Acta crystallographica Section D, Biological crystallography*, 66(Pt 2),  
676 125-132. doi:10.1107/S0907444909047337
- 677 Karplus, P. A., & Diederichs, K. (2012). Linking crystallographic model and data quality. *Science*,  
678 336(6084), 1030-1033. doi:10.1126/science.1218231
- 679 Kawasaki, T., Lange, I., & Feske, S. (2009). A minimal regulatory domain in the C terminus of  
680 STIM1 binds to and activates ORAI1 CRAC channels. *Biochemical and Biophysical Research  
681 Communications*, 385(1), 49-54. doi:10.1016/j.bbrc.2009.05.020
- 682 Kilmartin, J. V., Wright, B., & Milstein, C. (1982). Rat monoclonal antitubulin antibodies derived  
683 by using a new nonsecreting rat cell line. *The Journal of Cell Biology*, 93(3), 576-582.
- 684 Lacruz, R. S., & Feske, S. (2015). Diseases caused by mutations in ORAI1 and STIM1. *Ann N Y Acad  
685 Sci*, 1356, 45-79. doi:10.1111/nyas.12938
- 686 Lepple-Wienhues, A., & Cahalan, M. D. (1996). Conductance and permeation of monovalent  
687 cations through depletion-activated Ca<sup>2+</sup> channels (ICRAC) in Jurkat T cells. *Biophysical  
688 journal*, 71(2), 787-794. doi:10.1016/S0006-3495(96)79278-0
- 689 Li, Z., Lu, J., Xu, P., Xie, X., Chen, L., & Xu, T. (2007). Mapping the interacting domains of STIM1 and  
690 Orai1 in Ca<sup>2+</sup> release-activated Ca<sup>2+</sup> channel activation. *The Journal of Biological  
691 Chemistry*, 282(40), 29448-29456. doi:10.1074/jbc.M703573200
- 692 Liao, M., Cao, E., Julius, D., & Cheng, Y. (2013). Structure of the TRPV1 ion channel determined by  
693 electron cryo-microscopy. *Nature*, 504(7478), 107-112. doi:10.1038/nature12822
- 694 Liou, J., Kim, M. L., Heo, W. D., Jones, J. T., Myers, J. W., Ferrell, J. E., Jr., & Meyer, T. (2005). STIM is  
695 a Ca<sup>2+</sup> sensor essential for Ca<sup>2+</sup>-store-depletion-triggered Ca<sup>2+</sup> influx. *Curr Biol*, 15(13),  
696 1235-1241. doi:10.1016/j.cub.2005.05.055
- 697 Long, S. B., Campbell, E. B., & MacKinnon, R. (2005). Crystal structure of a mammalian voltage-  
698 dependent Shaker family K<sup>+</sup> channel. *Science (New York, NY)*, 309(5736), 897-903.  
699 doi:10.1126/science.1116269
- 700 McNally, B. A., Somasundaram, A., Jairaman, A., Yamashita, M., & Prakriya, M. (2013). The C- and  
701 N-terminal STIM1 binding sites on Orai1 are required for both trapping and gating CRAC  
702 channels. *J Physiol*, 591(11), 2833-2850. doi:10.1113/jphysiol.2012.250456
- 703 McNally, B. A., Somasundaram, A., Yamashita, M., & Prakriya, M. (2012). Gated regulation of CRAC  
704 channel ion selectivity by STIM1. *Nature*, 482(7384), 241-245. doi:10.1038/nature10752
- 705 Morais-Cabral, J. H., Zhou, Y., & Mackinnon, R. (2001). Energetic optimization of ion conduction  
706 rate by the K<sup>+</sup> selectivity filter. *Nature*, 414(6859), 37-42. doi:10.1038/35102000
- 707 Muik, M., Frischauf, I., Derler, I., Fahrner, M., Bergsmann, J., Eder, P., . . . Romanin, C. (2008).  
708 Dynamic coupling of the putative coiled-coil domain of ORAI1 with STIM1 mediates  
709 ORAI1 channel activation. *The Journal of Biological Chemistry*, 283(12), 8014-8022.  
710 doi:10.1074/jbc.M708898200

- 711 Navarro-Borelly, L., Somasundaram, A., Yamashita, M., Ren, D., Miller, R. J., & Prakriya, M. (2008).  
712 STIM1-Orai1 interactions and Orai1 conformational changes revealed by live-cell FRET  
713 microscopy. *The Journal of Physiology*, 586(Pt 22), 5383-5401.  
714 doi:10.1113/jphysiol.2008.162503
- 715 Nesin, V., Wiley, G., Kousi, M., Ong, E.-C., Lehmann, T., Nicholl, D. J., . . . Tsiokas, L. (2014).  
716 Activating mutations in STIM1 and ORAI1 cause overlapping syndromes of tubular  
717 myopathy and congenital miosis. *Proceedings of the National Academy of Sciences*,  
718 111(11), 4197-4202. doi:10.1073/pnas.1312520111
- 719 Otwinowski, Z., & Minor, W. (1997). Processing of X-ray Diffraction Data Collected in Oscillation  
720 Mode. *Methods in Enzymology*, 276(Macromolecular Crystallography, PART a), 307-326.
- 721 Palty, R., Fu, Z., & Isacoff, E. Y. (2017). Sequential Steps of CRAC Channel Activation. *CellReports*,  
722 19(9), 1929-1939. doi:10.1016/j.celrep.2017.05.025
- 723 Palty, R., Stanley, C., & Isacoff, E. Y. (2015). Critical role for Orai1 C-terminal domain and TM4 in  
724 CRAC channel gating. *Cell Research*, 25(8), 963-980. doi:10.1038/cr.2015.80
- 725 Park, C. Y., Hoover, P. J., Mullins, F. M., Bachhawat, P., Covington, E. D., Raunser, S., . . . Lewis, R. S.  
726 (2009). STIM1 clusters and activates CRAC channels via direct binding of a cytosolic  
727 domain to Orai1. *Cell*, 136(5), 876-890. doi:10.1016/j.cell.2009.02.014
- 728 Payandeh, J., Scheuer, T., Zheng, N., & Catterall, W. A. (2011). The crystal structure of a voltage-  
729 gated sodium channel. *Nature*, 475(7356), 353-358. doi:10.1038/nature10238
- 730 Prakriya, M., Feske, S., Gwack, Y., Srikanth, S., Rao, A., & Hogan, P. G. (2006). Orai1 is an essential  
731 pore subunit of the CRAC channel. *Nature*, 443(7108), 230-233. doi:10.1038/nature05122
- 732 Prakriya, M., & Lewis, R. S. (2006). Regulation of CRAC channel activity by recruitment of silent  
733 channels to a high open-probability gating mode. *The Journal of general physiology*,  
734 128(3), 373-386. doi:10.1085/jgp.200609588
- 735 Prakriya, M., & Lewis, R. S. (2015). Store-Operated Calcium Channels. *Physiological reviews*,  
736 95(4), 1383-1436. doi:10.1152/physrev.00020.2014
- 737 Roos, J., DiGregorio, P. J., Yeromin, A. V., Ohlsen, K., Lioudyno, M., Zhang, S., . . . Stauderman, K. A.  
738 (2005). STIM1, an essential and conserved component of store-operated Ca<sup>2+</sup> channel  
739 function. *The Journal of Cell Biology*, 169(3), 435-445. doi:10.1083/jcb.200502019
- 740 Saotome, K., Singh, A. K., Yelshanskaya, M. V., & Sobolevsky, A. I. (2016). Crystal structure of the  
741 epithelial calcium channel TRPV6. *Nature*, 534(7608), 506-511. doi:10.1038/nature17975
- 742 Schröder, G. F., Brunger, A. T., & Levitt, M. (2007). Combining efficient conformational sampling  
743 with a deformable elastic network model facilitates structure refinement at low  
744 resolution. *Structure (London, England : 1993)*, 15(12), 1630-1641.  
745 doi:10.1016/j.str.2007.09.021
- 746 Schröder, G. F., Levitt, M., & Brunger, A. T. (2010). Super-resolution biomolecular crystallography  
747 with low-resolution data. *Nature*, 464(7292), 1218-1222. doi:10.1038/nature08892



- 748 Tang, L., Gamal El-Din, T. M., Payandeh, J., Martinez, G. Q., Heard, T. M., Scheuer, T., . . . Catterall,  
749 W. A. (2014). Structural basis for Ca<sup>2+</sup> selectivity of a voltage-gated calcium channel.  
750 *Nature*, *505*(7481), 56-61. doi:10.1038/nature12775
- 751 Tirado-Lee, L., Yamashita, M., & Prakriya, M. (2015). Conformational Changes in the Orai1 C-  
752 Terminus Evoked by STIM1 Binding. *PloS one*, *10*(6), e0128622.  
753 doi:10.1371/journal.pone.0128622
- 754 Vig, M., Beck, A., Billingsley, J. M., Lis, A., Parvez, S., Peinelt, C., . . . Penner, R. (2006). CRACM1  
755 multimers form the ion-selective pore of the CRAC channel. *Current biology : CB*, *16*(20),  
756 2073-2079. doi:10.1016/j.cub.2006.08.085
- 757 Vig, M., Peinelt, C., Beck, A., Koomoa, D. L., Rabah, D., Koblan-Huberson, M., . . . Kinet, J. P. (2006).  
758 CRACM1 is a plasma membrane protein essential for store-operated Ca<sup>2+</sup> entry. *Science*,  
759 *312*(5777), 1220-1223. doi:10.1126/science.1127883
- 760 Vonrhein, C., Blanc, E., Roversi, P., & Bricogne, G. (2007). Automated structure solution with  
761 autoSHARP. *Methods Mol Biol*, *364*, 215-230. doi:10.1385/1-59745-266-1:215
- 762 Word, J. M., Lovell, S. C., LaBean, T. H., Taylor, H. C., Zalis, M. E., Presley, B. K., . . . Richardson, D. C.  
763 (1999). Visualizing and quantifying molecular goodness-of-fit: small-probe contact dots  
764 with explicit hydrogen atoms. *J Mol Biol*, *285*(4), 1711-1733. doi:10.1006/jmbi.1998.2400
- 765 Wu, J., Yan, Z., Li, Z., Qian, X., Lu, S., Dong, M., . . . Yan, N. (2016). Structure of the voltage-gated  
766 calcium channel Ca(v)1.1 at 3.6 Å resolution. *Nature*, *537*(7619), 191-196.  
767 doi:10.1038/nature19321
- 768 Yamashita, M., Yeung, P. S.-W., Ing, C. E., McNally, B. A., Pomès, R., & Prakriya, M. (2017). STIM1  
769 activates CRAC channels through rotation of the pore helix to open a hydrophobic gate.  
770 *Nature communications*, *8*, 14512. doi:10.1038/ncomms14512
- 771 Yang, X., Jin, H., Cai, X., Li, S., & Shen, Y. (2012). Structural and mechanistic insights into the  
772 activation of Stromal interaction molecule 1 (STIM1). *Proceedings of the National Academy  
773 of Sciences*. doi:10.1073/pnas.1118947109
- 774 Yen, M., Lokteva, L. A., & Lewis, R. S. (2016). Functional Analysis of Orai1 Concatemers Supports a  
775 Hexameric Stoichiometry for the CRAC Channel. *Biophys J*, *111*(9), 1897-1907.  
776 doi:10.1016/j.bpj.2016.09.020
- 777 Yeromin, A. V., Zhang, S. L., Jiang, W., Yu, Y., Safrina, O., & Cahalan, M. D. (2006). Molecular  
778 identification of the CRAC channel by altered ion selectivity in a mutant of Orai. *Nature*,  
779 *443*(7108), 226-229. doi:10.1038/nature05108
- 780 Zhang, S. L., Yeromin, A. V., Hu, J., Amcheslavsky, A., Zheng, H., & Cahalan, M. D. (2011). Mutations  
781 in Orai1 transmembrane segment 1 cause STIM1-independent activation of Orai1  
782 channels at glycine 98 and channel closure at arginine 91. *Proceedings of the National  
783 Academy of Sciences*, *108*(43), 17838-17843. doi:10.1073/pnas.1114821108

- 784 Zhang, S. L., Yeromin, A. V., Zhang, X. H.-F., Yu, Y., Safrina, O., Penna, A., . . . Cahalan, M. D. (2006).  
785 Genome-wide RNAi screen of Ca(2+) influx identifies genes that regulate Ca(2+) release-  
786 activated Ca(2+) channel activity. *Proceedings of the National Academy of Sciences of the*  
787 *United States of America*, 103(24), 9357-9362. doi:10.1073/pnas.0603161103
- 788 Zhang, S. L., Yu, Y., Roos, J., Kozak, J. A., Deerinck, T. J., Ellisman, M. H., . . . Cahalan, M. D. (2005).  
789 STIM1 is a Ca<sup>2+</sup> sensor that activates CRAC channels and migrates from the Ca<sup>2+</sup> store to  
790 the plasma membrane. *Nature*, 437(7060), 902-905. doi:10.1038/nature04147
- 791 Zhou, Y., Cai, X., Loktionova, N. A., Wang, X., Nwokonko, R. M., Wang, X., . . . Gill, D. L. (2016). The  
792 STIM1-binding site nexus remotely controls Orai1 channel gating. *Nature*  
793 *communications*, 7, 13725. doi:10.1038/ncomms13725

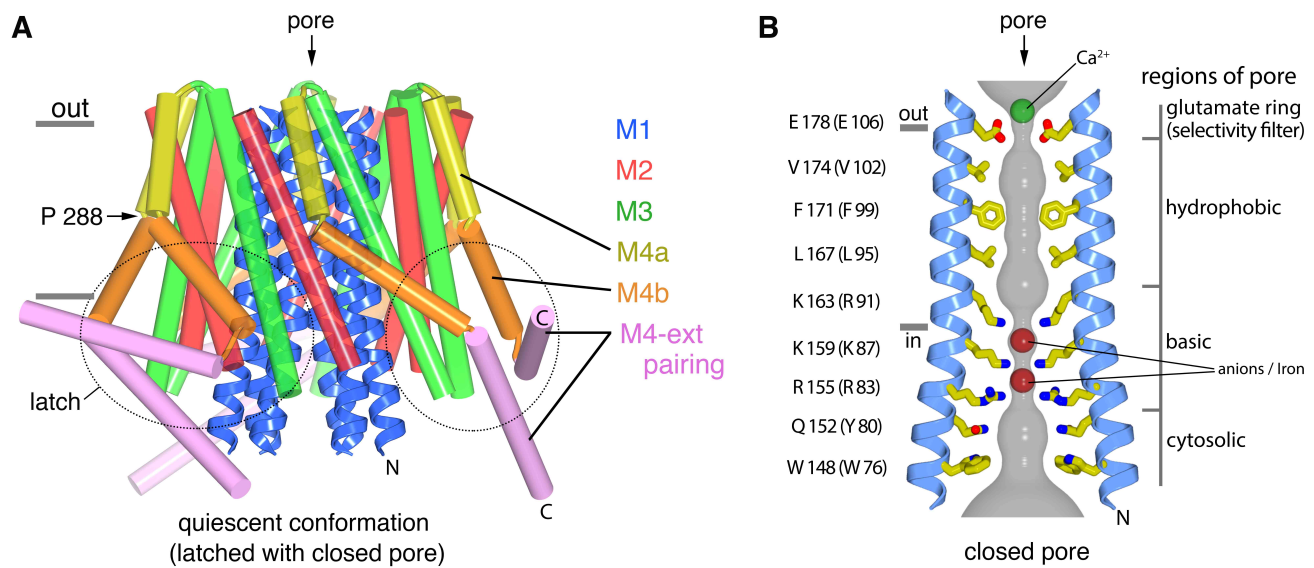

794 **Figure 1.** The quiescent conformation –latched with a closed pore. **a**, Overall structure of Orai, from  
 795 PDB ID 4HKR, in a “quiescent” conformation(Hou, Pedi, Diver, & Long, 2012). The pore is closed; M4-  
 796 ext helices pair with one another. The M1 helices are depicted as blue ribbons; other helices are  
 797 cylinders. The approximate boundaries of the plasma membrane are shown as gray bars. Regions of  
 798 the channel referred to as “latches” in this study are indicated as dashed ovals; the latches are  
 799 comprised of interactions between M4b and M3 and the pairing of M4-ext helices. **b**, Close-up view  
 800 of the closed pore. Two M1 helices are drawn as ribbons (four M1 helices are omitted for clarity).  
 801 The pore is depicted as a gray surface indicating the minimal radial distance to the nearest van der  
 802 Waals contact. Amino acid side chains that form the walls of the pore are drawn as sticks and colored  
 803 (yellow for carbon, blue for nitrogen, and red for oxygen). Amino acid numbering is shown for  
 804 *Drosophila melanogaster* Orai without parentheses and for human Orai in parentheses. Sections of  
 805 the pore are indicated. Horizontal gray bars correspond to the approximate boundaries of the  
 806 membrane, although the M1 helices are shielded from the membrane by M2 and M3. A Ca<sup>2+</sup> ion is  
 807 indicated. Red spheres mark the location of anomalous difference electron density attributed to iron,  
 808 perhaps bound as (FeCl<sub>6</sub>)<sup>3-</sup> (Hou et al., 2012). The complex anion (IrCl<sub>6</sub>)<sup>3-</sup> also binds in these sites(Hou  
 809 et al., 2012).

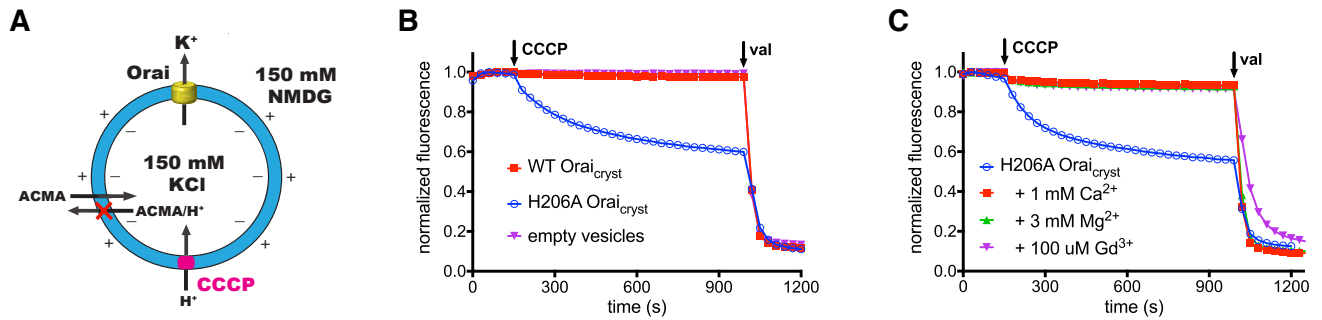

810 **Figure 2.** Ion flux through H206A Orai<sub>cryst</sub> in liposomes. **a**, Schematic of the fluorescence-based flux  
811 assay. Vesicles containing WT or H206A Orai<sub>cryst</sub> or those prepared without protein (empty vesicles)  
812 were loaded with 150 mM KCl and were diluted 50-fold into flux buffer containing a fluorescent pH  
813 indicator (ACMA) and 150 mM N-methyl-D-glucamine (NMDG) to establish a K<sup>+</sup> gradient (Methods).  
814 After stabilization of the fluorescence signal (150 s), a proton ionophore (CCCP) was added. An  
815 electric potential arising from K<sup>+</sup> efflux was used to drive the uptake of protons, which quenches the  
816 fluorescence of ACMA. A red “X” indicates that ACMA is not membrane-permeable in the protonated  
817 form. **b**, K<sup>+</sup> flux measurements for WT and H206A Orai<sub>cryst</sub>. The time-dependent decrease in  
818 fluorescence observed for H206A Orai<sub>cryst</sub> after the addition of CCCP is indicative of K<sup>+</sup> flux.  
819 Valinomycin (val) was added after 990 s to render all vesicles permeable to K<sup>+</sup> and establish a baseline  
820 fluorescence. Traces were normalized by dividing by the initial fluorescence value, which was within  
821 ±10% for each experiment. **c**, K<sup>+</sup> flux through H206A Orai<sub>cryst</sub> is inhibited by Ca<sup>2+</sup>, Mg<sup>2+</sup> and Gd<sup>3+</sup>.

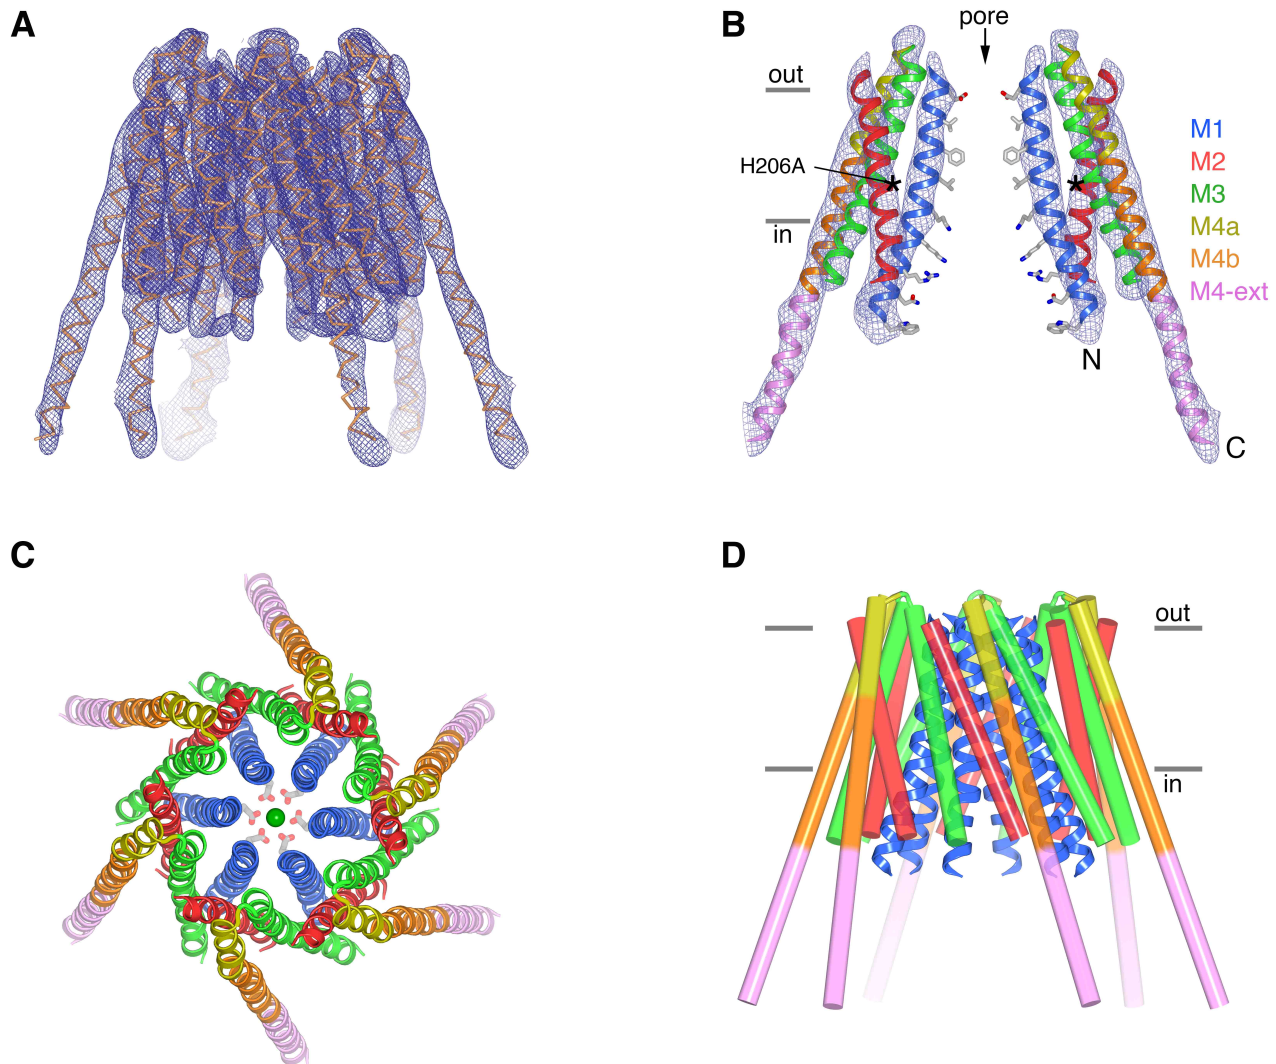

822 **Figure 3.** The structure of H206A Orai<sub>cryst</sub> reveals an open conformation. **a**, Electron density map of  
823 H206A Orai<sub>cryst</sub>. The map (blue mesh, contoured at 1.4  $\sigma$ , and covering one channel) was calculated  
824 from 20 – 6.7 Å using native-sharpened amplitudes and phases that were improved by 24-fold non-  
825 crystallographic symmetry (NCS) averaging, solvent flattening and histogram matching (Methods).  
826 The atomic model is shown in C $\alpha$  representation. Movie 1 shows a video of this Figure. **b**, Side view  
827 showing two opposing subunits of H206A Orai<sub>cryst</sub> and the same electron density map. Asterisks mark  
828 the location of the H206A substitution. Amino acid side chains on the pore are shown only for  
829 reference (sticks). Approximate boundaries of the membrane are shown as horizontal bars. Helices  
830 are depicted as ribbons and colored as indicated. **c**, Extracellular view showing the hexameric  
831 architecture. Helices are depicted as ribbons, with Glu178 side chains (sticks) and Ca<sup>2+</sup> ion (green  
832 sphere) shown for reference. **d**, Overall structure, shown in the same orientation as **(a)**. The M1  
833 helices are drawn as blue ribbons and the other helices are shown as cylinders.

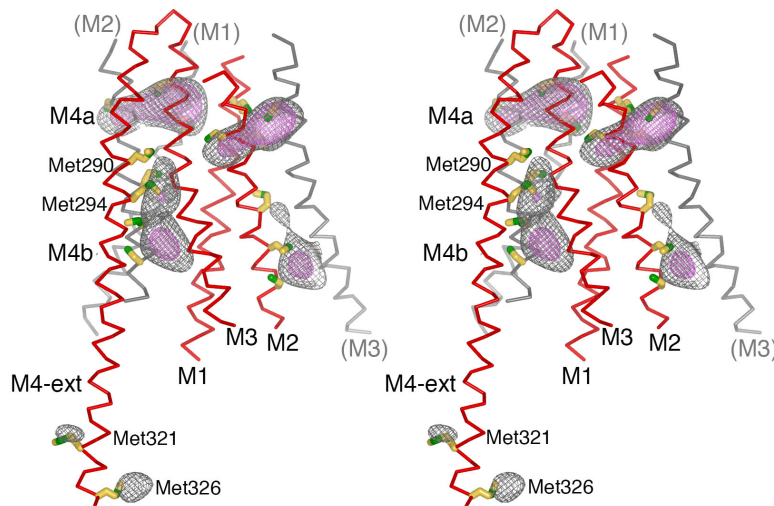

834 **Figure 3-figure supplement 1.** Anomalous-difference electron-density at cysteine and methionine  
835 residues in the final model of H206A Orai<sub>crystr</sub>, depicted in stereo. An anomalous-difference electron-  
836 density map was calculated from 25 to 10 Å resolution from highly redundant diffraction data  
837 collected with  $\lambda = 1.7085$  Å X-rays (NaI experiment, Table 1) using anomalous differences as  
838 amplitudes and phases that were determined by MR-SAD, 24-fold NCS averaging, solvent flattening  
839 and histogram matching (Methods). This map was then averaged in real-space according to the 24-  
840 fold NCS symmetry to yield the map shown. The map is contoured at  $5.5 \sigma$  (gray mesh) and  $8.5 \sigma$   
841 (pink mesh) and shown in the vicinity of a subunit of Orai (red C $\alpha$  trace). Methionine and cysteine  
842 residues are shown as sticks (colored yellow for carbon and green for sulfur atoms). Methionine  
843 residues on M4b and M4-ext are labeled. Portions of neighboring Orai subunits (gray C $\alpha$  traces) are  
844 shown for reference with their helices labeled in parentheses. While their side chain conformations  
845 are hypothetical on account of the limited resolution of the diffraction data, anomalous-difference  
846 electron-density peaks for methionine and/or cysteine residues on each of the M1-M4 helices and on  
847 the M4-ext helix confirm the amino acid register of the atomic model.

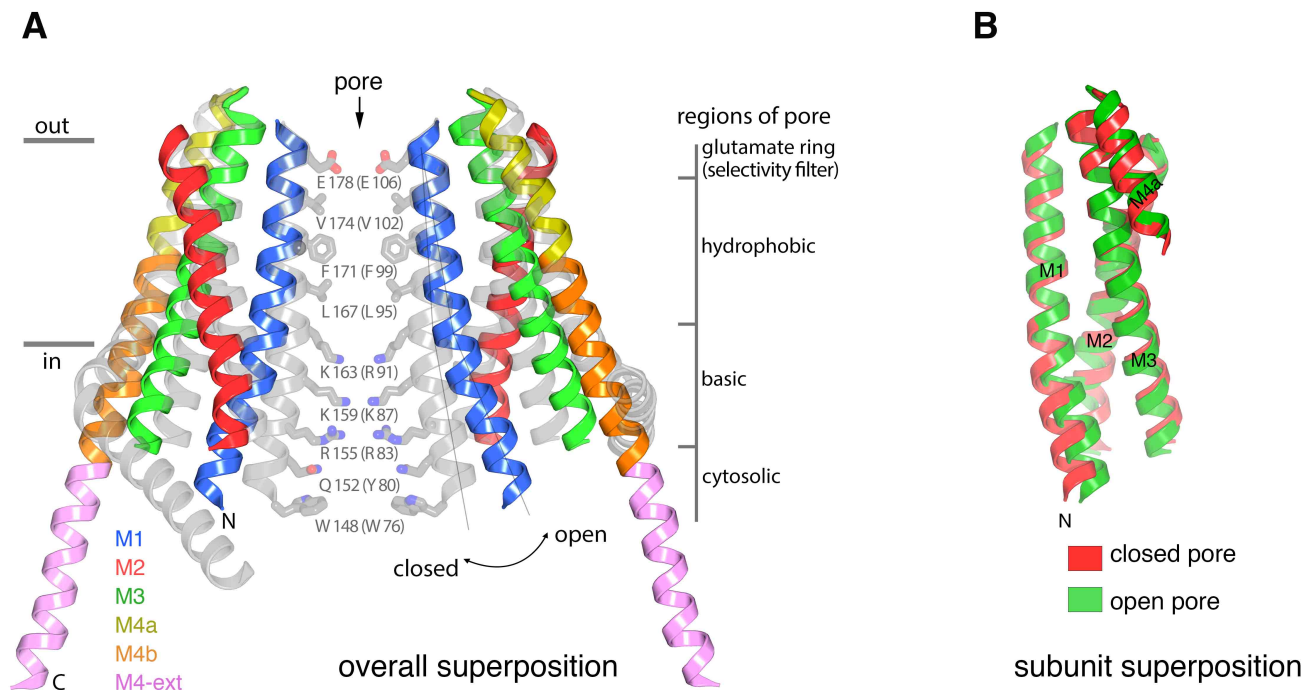

848 **Figure 4.** Conformational changes between the quiescent and open conformations. **a**, Superimposed  
 849 structures of the quiescent (PDB ID: 4HKR) and open (H206A Orai<sub>cryst</sub>) conformations are drawn in  
 850 ribbon representation. Two opposing subunits are shown, surrounding the pore, with the open  
 851 conformation colored as indicated and the closed conformation in gray. Thin lines and a curved arrow  
 852 highlight the outward rotation of subunits (with its fulcrum near Glu178) and the slight additional  
 853 bend in M1. Conformational changes of M4/M4-ext are also apparent. Amino acids forming the  
 854 walls of the closed pore (from the quiescent conformation) are shown as sticks, with corresponding  
 855 regions of the pore indicated. Amino acids in parentheses denote human Orai1 counterparts.  
 856 Horizontal bars indicate approximate boundaries of the plasma membrane. **b**, Comparison of M1-  
 857 M4a from individual subunits between the quiescent and open conformations. The region of an Orai  
 858 subunit spanning M1 through M4a was superimposed between the quiescent (red ribbons, PDB ID  
 859 4HKR) and open (green ribbons, H206A Orai<sub>cryst</sub>) conformations. The slight additional bend in M1 of  
 860 the open conformation is apparent at its N-terminal end. Otherwise the M1-to-M4b region of the  
 861 two subunits superimpose within the error of the coordinates of the open conformation (the root-  
 862 mean-squared deviation for the C $\alpha$  positions of residues 163 to 288 is 1.1 Å).

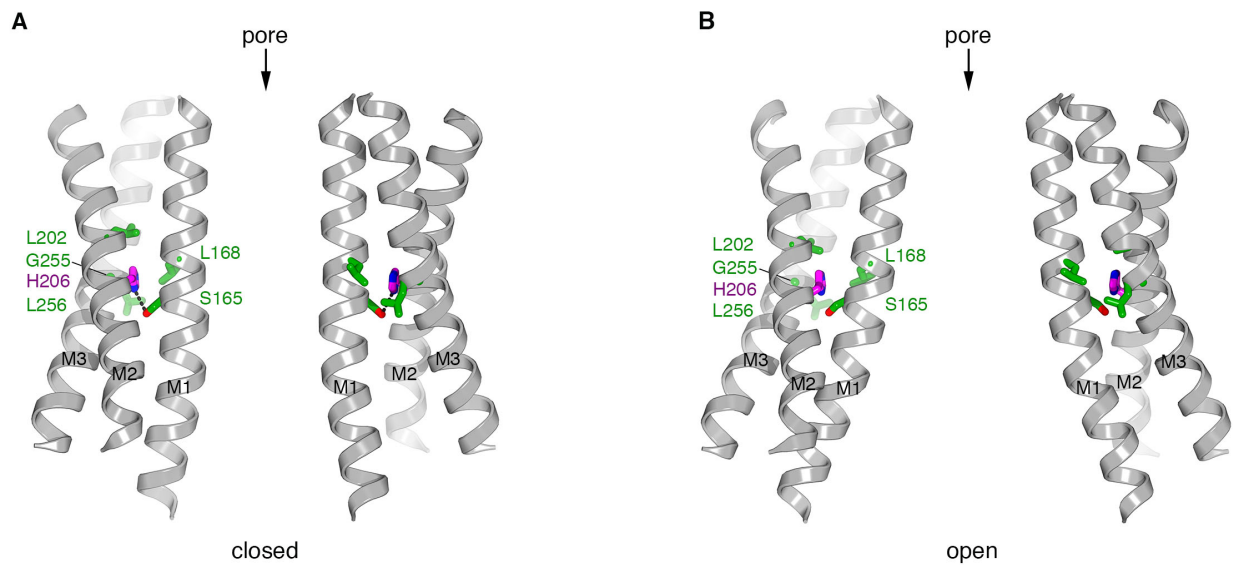

863 **Figure 4-figure supplement 1.** Residue 206 in closed and open pores. **a**, Depiction of the closed pore  
864 (PDB ID 4HKR). M1 through M3 are drawn as ribbons for two apposing subunits. His206 (H206, pink)  
865 and the amino acid side chains within van der Waals distance (green) are drawn as sticks. A hydrogen  
866 bond made between His206 and Ser165 is shown as a dashed line. **b**, Depiction of the open  
867 conformation (H206A Oraic<sub>cryst</sub>), showing the corresponding regions as in **(a)**. The conformations of  
868 the amino acid side chains in the atomic model are shown for reference to indicate plausibility  
869 despite the limited resolution of the diffraction data. Amino acid 206 is depicted as the wild type  
870 histidine to indicate that this amino acid could be accommodated in the observed conformation of  
871 the channel without steric hindrance.



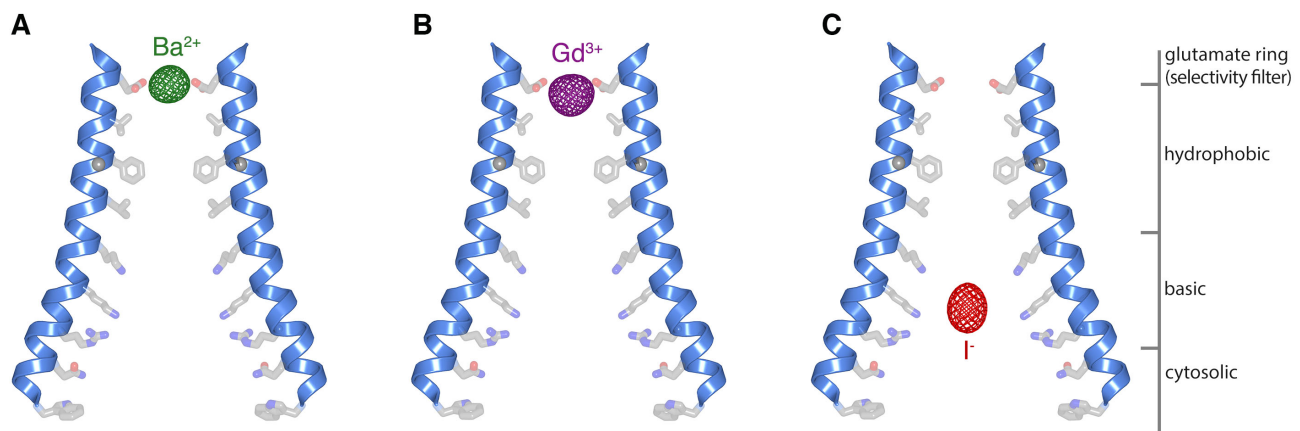

872 **Figure 5.** Ion binding in the open pore. **a-c**, Anomalous-difference electron density maps (mesh) for  
873 crystals of H206A Orai<sub>cryst</sub> with Ba<sup>2+</sup> (**a**), Gd<sup>3+</sup> (**b**), and I<sup>-</sup> (**c**). M1 helices of two opposing subunits are  
874 shown as ribbons. Side chains proposed to line the pore (sticks) are drawn for reference; their  
875 conformations are hypothetical. The maps are contoured at 10  $\sigma$  and calculated from 25 to 9 Å for (**a**-  
876 **b**), and at 7  $\sigma$  and calculated from 25 to 10 Å for (**c**).

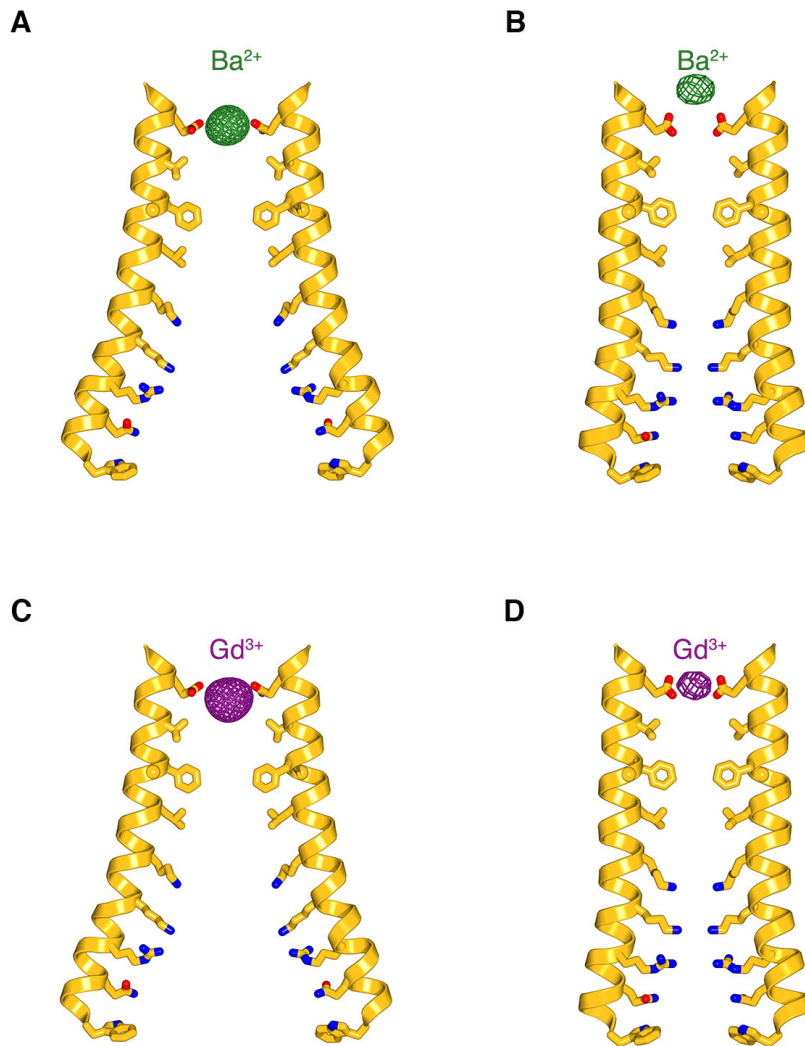

877 **Figure 5-figure supplement 1.** Comparison of the anomalous-difference electron-density peaks for  
878 Ba<sup>2+</sup> and Gd<sup>3+</sup> in the open and closed pores. **a-b**, Anomalous-difference electron density for Ba<sup>2+</sup>  
879 (green mesh) in open pore of H206A Orai<sub>cryst</sub> (from Figure 5A) and in the closed pore of the quiescent  
880 conformation (from (Hou et al., 2012)), respectively. M1 helices (amino acids 148 to 180) are  
881 depicted from two opposite subunits as ribbon representations. Pore-lining side chains (sticks) are  
882 drawn for reference in **(a)** since their conformations cannot be determined due to the limits of the  
883 diffraction data, and they are shown in **(b)** according to their observed conformations (Hou et al.,  
884 2012). **c-d**, Analogous depictions for the anomalous-difference electron-density peaks for Gd<sup>3+</sup> in the  
885 open pore (**c**, from Figure 5B) and closed pore (**d**, from (Hou et al., 2012)).

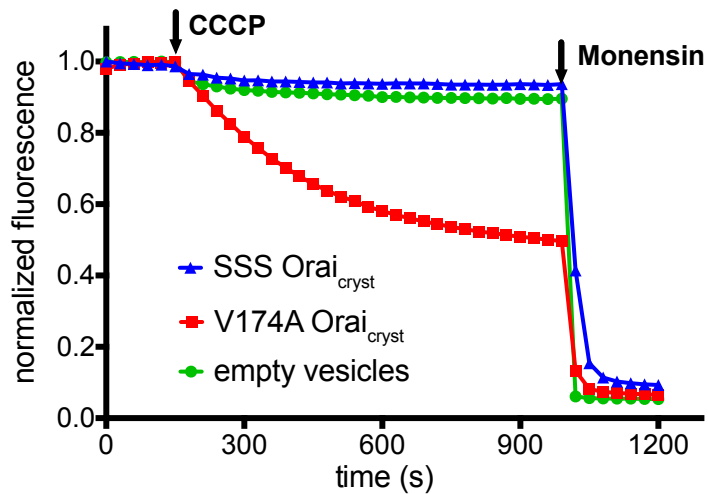

886 **Figure 6.** Ion flux measurements for purified channels with mutations within the hydrophobic and  
887 basic regions of the pore. “SSS Orai<sub>cryst</sub>” denotes the simultaneous mutation of the three basic  
888 residues to serine (R155S, K159S, and K163S). In the context of the hexameric channel, this mutant  
889 purges all eighteen basic residues from the pore. “V174A Orai<sub>cryst</sub>” denotes the mutation of Val174,  
890 which is located in the hydrophobic section of the pore, to alanine. Purified proteins were  
891 reconstituted into liposomes to assay for sodium (Na<sup>+</sup>) flux under divalent-free conditions (Methods)  
892 as described previously (Hou et al., 2012). After stabilization of the fluorescence signal (150 sec), the  
893 proton ionophore CCCP was added to the sample. A decrease in fluorescence is indicative of Na<sup>+</sup> flux  
894 out of the proteoliposomes. The Na<sup>+</sup> ionophore monensin was added after 990 sec to render all  
895 vesicles permeable to Na<sup>+</sup> and establish the minimum baseline fluorescence. The traces were  
896 normalized to the initial fluorescence value, which was within ±10% in the experiments. Substantial  
897 fluorescence decrease is observed for V174A Orai<sub>cryst</sub>, indicating constitutive activity. The signal for  
898 SSS Orai<sub>cryst</sub> is comparable to what is observed for liposomes without protein (“empty vesicles”).

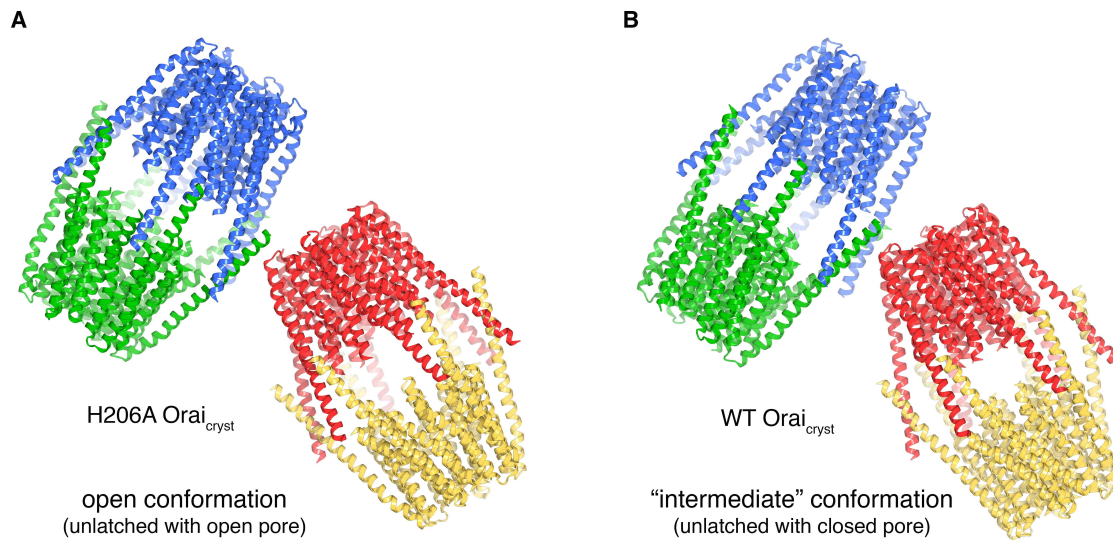

899 **Figure 7.** Molecular packing in the crystals of H206A Orai<sub>cryst</sub> and WT Orai<sub>cryst</sub>. **a**, Crystal packing of  
900 H206A Orai<sub>cryst</sub>. The contents of the asymmetric unit, consisting of four complete channels, is shown.  
901 Each channel is colored a unique color and shown in ribbon representation. The channels interact  
902 with one another via coiled-coil interactions between their M4-ext helices. **b**, Packing of WT Orai<sub>cryst</sub>  
903 in the crystal, showing the contents of the asymmetric unit, depicted analogously to **a**.

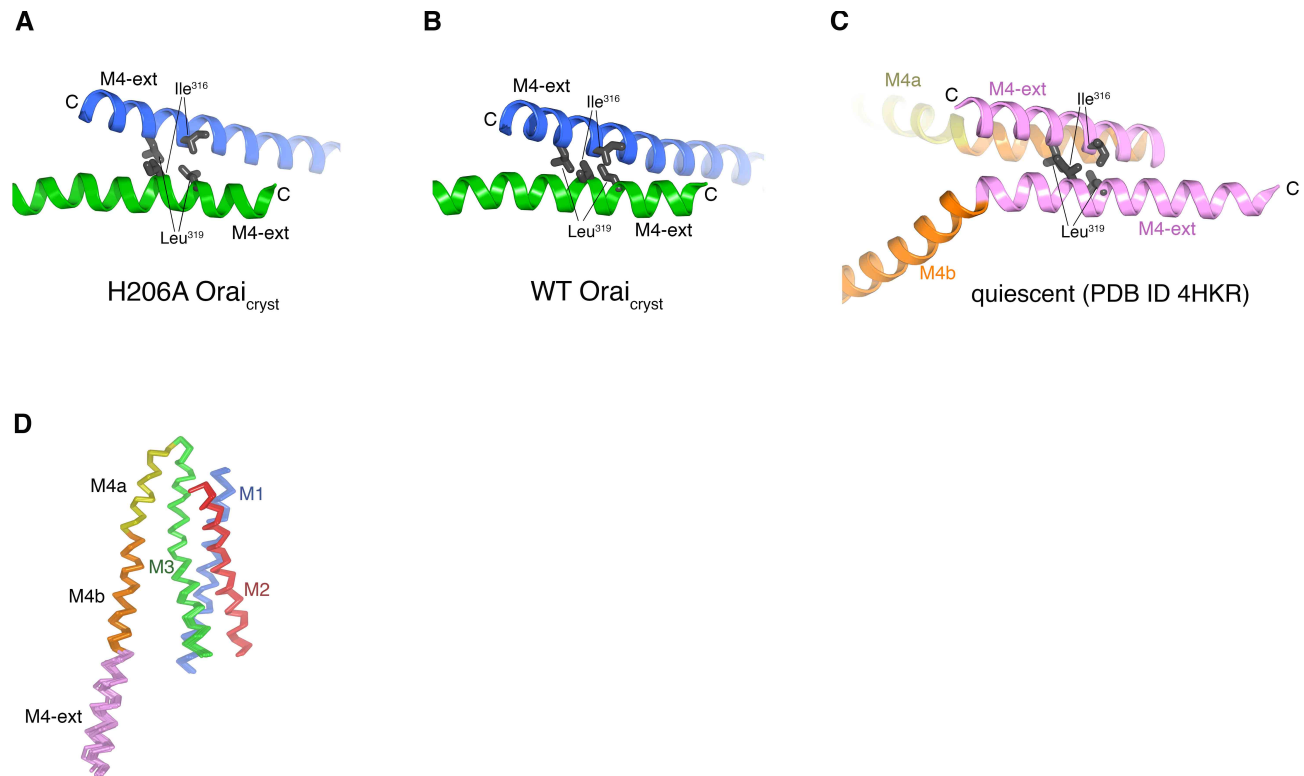

904 **Figure 7-figure supplement 1.** M4-ext helices and subunit comparisons. **a**, Close up view of a coiled-  
905 coil interaction between two M4-ext helices of the blue- and green-colored channels in the  
906 asymmetric unit of H206A Orai<sub>crycst</sub> (from Figure 7A). Ile316 and Leu319, which form the hydrophobic  
907 interface of the coiled-coil interaction on each of the M4-ext helices, are drawn as gray sticks for  
908 reference. **b**, Analogous coiled-coil interaction between two M4-ext helices of the blue- and green-  
909 colored channels in the asymmetric unit of WT Orai<sub>crycst</sub> (from Figure 7B). **c**, Coiled-coil interaction of  
910 two paired M4-ext helices observed in the quiescent conformation, which occurs between adjacent  
911 subunits of the same channel (from Figure 1, PDB ID 4HKR). **d**, Superposition of the 24 individual  
912 subunits (from four hexameric channels) of H206A Orai<sub>crycst</sub> within the asymmetric unit, shown in  $\alpha$   
913 representation.

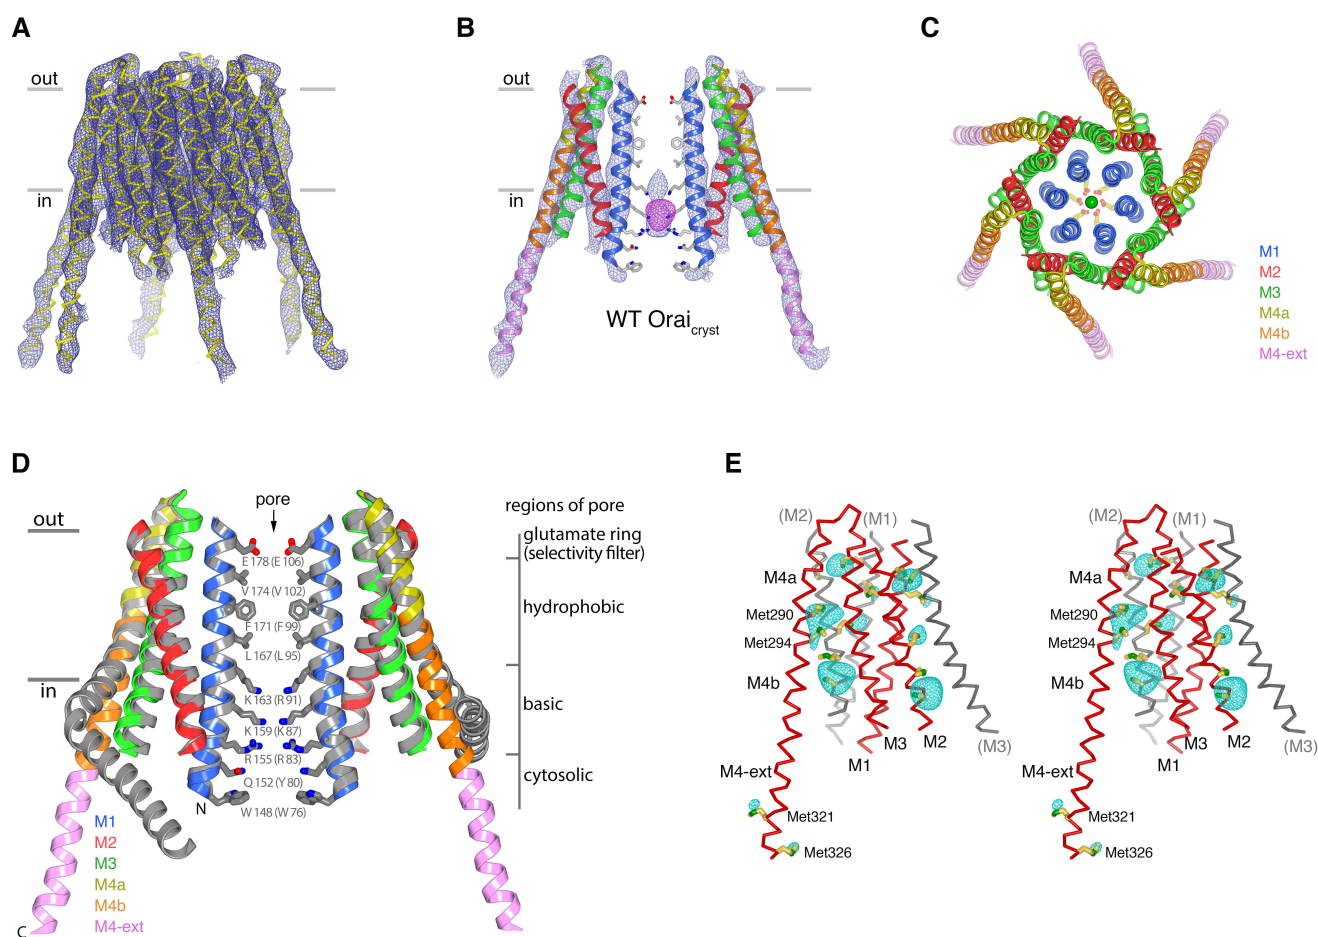

914 **Figure 8.** The structure of WT Orai<sub>cryst</sub> reveals an intermediate conformation: unlatched with a closed pore. 915 pore. **a**, Electron density for WT Orai<sub>cryst</sub>, shown as blue mesh covering the channel (C $\alpha$  916 representation). The map (contoured at 1.3  $\sigma$ ) was calculated from 20 – 6.9 Å using native sharpened 917 amplitudes and phases that were determined by MR-SAD and improved by 24 fold NCS averaging, 918 solvent flattening and histogram matching (Methods). **b**, Electron density, from **a** (blue mesh), 919 covering two opposing subunits of WT Orai<sub>cryst</sub> (cartoon representation, colored as indicated in **d**). 920 Anomalous-difference electron-density (from iron) in the basic region of the pore is shown as 921 magenta mesh (map calculated from 25 – 9 Å and contoured at 5  $\sigma$ ). Conformations of pore residues 922 are based on the quiescent conformation (PDB ID 4HKR). **c**, Extracellular view of WT Orai<sub>cryst</sub>. Helices 923 are drawn as ribbons and colored as indicated, with Glu178 side chains (sticks) and Ca<sup>2+</sup> ion (green 924 sphere) shown for reference. **d**, Superposition of the crystal structure of the quiescent conformation 925 (PDB ID 4HKR) and the structure of the intermediate conformation (WT Orai<sub>cryst</sub>). Two subunits of 926 each channel are shown. The quiescent conformation is gray; the structure of WT Orai<sub>cryst</sub> is shown in 927 colors. Amino acids lining the pore of the quiescent conformation are shown as sticks. A slight 928 outward displacement of the intracellular side of M3 is observed in the structure of WT Orai<sub>cryst</sub>; 929 otherwise the conformations of M1-M4a are indistinguishable within the resolution limits of the 930 diffraction data (RMSD for C $\alpha$  positions 148 to 288 is 0.9 Å). **e**, Anomalous-difference electron-density 931 peaks at cysteine and methionine residues confirms the amino acid register of the WT Orai<sub>cryst</sub> 932 structure (stereo representation). An anomalous-difference electron-density map was calculated 933 from 25 to 9 Å resolution from data collected with  $\lambda = 1.738$  Å X-rays (Extended Data Table 2) using 934 anomalous differences as amplitudes and phases from (**a**). This map was then averaged in real-space

935 according to the 24-fold NCS symmetry to yield the map shown. The map is contoured at  $5\sigma$  (cyan  
936 mesh) and shown in the vicinity of a subunit of Orai (red  $C\alpha$  trace). Methionine and cysteine residues  
937 are shown as sticks (colored yellow for carbon and green for sulfur atoms). Methionine residues on  
938 M4b and M4-ext are labeled. Portions of neighboring Orai subunits (gray  $C\alpha$  traces) are shown for  
939 reference with their helices labeled in parentheses. Side chain conformations are hypothetical.

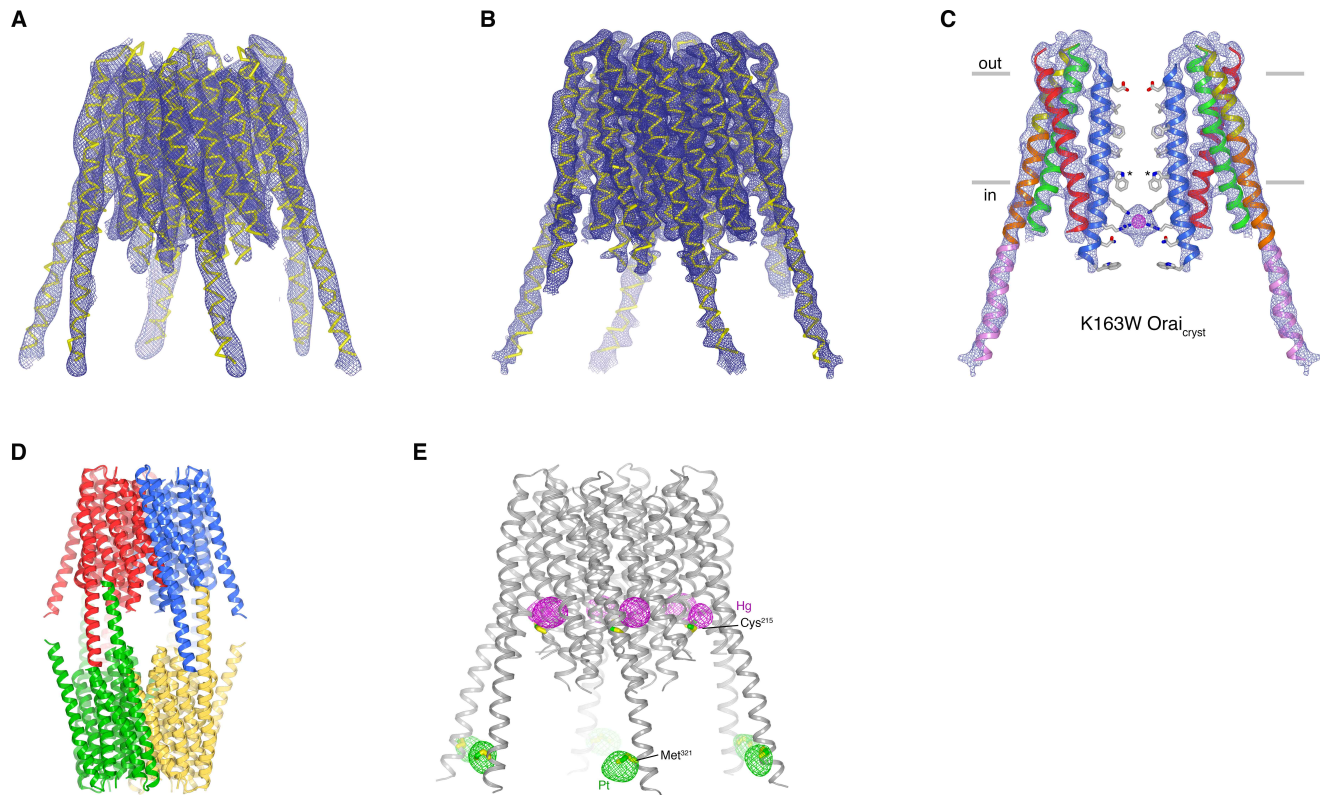

940 **Figure 8-figure supplement 1.** Structures of K163W Orai<sub>crySt</sub> in I<sub>4</sub><sub>1</sub> and P<sub>4</sub><sub>2</sub><sub>1</sub><sub>2</sub> crystal forms (unlatched  
941 with closed pore). **a**, Structure of K163W Orai<sub>crySt</sub> from the I<sub>4</sub><sub>1</sub> crystal form. The map (contoured at  
942 1.3 σ) was calculated from 20 – 6.1 Å using native-sharpened amplitudes and experimental phases  
943 that were determined by MIRAS and were improved by 24-fold NCS averaging, solvent flattening and  
944 histogram matching (Methods). The atomic model is shown in Cα representation (yellow). The  
945 crystal form is analogous to crystals of H206A Orai<sub>crySt</sub> and WT Orai<sub>crySt</sub>, and has analogous crystal  
946 packing. The root-mean-squared deviation (RMSD) for Cα positions between the structures of WT  
947 Orai<sub>crySt</sub> and K163W Orai<sub>crySt</sub> is 0.5 Å. **b**, 4.35 Å resolution structure of K163W Orai<sub>crySt</sub> in the P<sub>4</sub><sub>2</sub><sub>1</sub><sub>2</sub>  
948 crystal form. Electron density (mesh) covering the channel is shown. The map (contoured at 1.3 σ)  
949 was calculated from 20 – 4.35 Å using sharpened amplitudes and phases that were determined by  
950 MR and were improved by 3-fold non-crystallographic symmetry (NCS) averaging, solvent flattening  
951 and histogram matching (Methods). **c**, Two opposing subunits of K163W Orai<sub>crySt</sub> (P<sub>4</sub><sub>2</sub><sub>1</sub><sub>2</sub> crystal  
952 form), showing the pore, with electron density from (b). Amino acids on the pore are depicted as  
953 sticks (conformations based on PDB 4HKS; Methods). Anomalous-difference electron density in the  
954 pore is shown as magenta mesh (calculated from 30 - 8 Å resolution using anomalous differences as  
955 amplitudes, and contoured at 3.8 σ). Asterisks mark the locations of K163W substitutions. **d**, Packing  
956 of K163W Orai<sub>crySt</sub> in the P<sub>4</sub><sub>2</sub><sub>1</sub><sub>2</sub> crystal form. The contents of each asymmetric unit (three Orai  
957 subunits) are colored a unique color. Two asymmetric units (e.g. blue and red) form a complete  
958 channel. The channels interact with one another in the crystal lattice via coiled-coil interactions  
959 between their M4-ext helices. **e**, Anomalous-difference electron-density for heavy atom derivatives  
960 of K163W Orai<sub>crySt</sub> in the I<sub>4</sub><sub>1</sub> space group. One channel of the asymmetric unit is depicted as ribbons.  
961 The map for the platinum (Pt) derivative (magenta mesh, calculated from 25 to 8.0 Å, and contoured  
962 at 4.5 σ) was calculated from data collected from a crystal soaked in PIP (Table 2), using anomalous  
963 differences as amplitudes and phases from a. The analogous map for the mercury (Hg) derivative



964 (green mesh, calculated from 25 to 8.0 Å, and contoured at 5  $\sigma$ ) was calculated from data collected  
965 from a crystal soaked in PCMB (Table 2). Each channel in the asymmetric unit has anomalous-  
966 difference density at these sites (24 sites for each derivative, Table 2). Cys<sup>215</sup> and Met<sup>321</sup> residues, to  
967 which the heavy atoms presumably bind, are depicted as sticks.

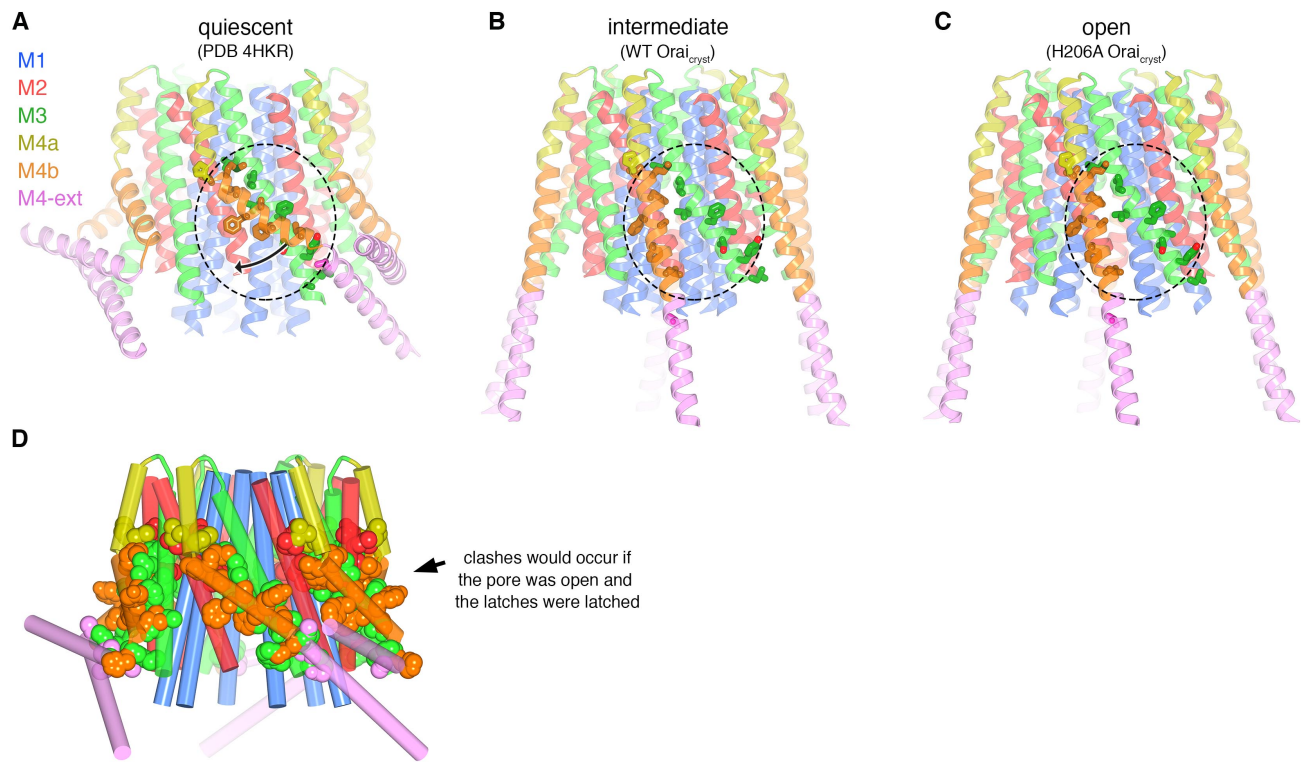

968 **Figure 9.** Unlatching is necessary for pore opening. **a**, Quiescent conformation (PDB ID: 4HKR)  
969 highlighting interactions between M4b and M3. The channel is shown in cartoon representation. On  
970 one of the Orai subunits, amino acids in the interface between M4b (orange) and M3 (green), which  
971 is highlighted by a dashed oval, are shown as sticks and colored accordingly. This interface exists for  
972 all six subunits and is stabilized by the pairing of M4-ext helices (pink). An arrow denotes the  
973 movement of M4b between **(a)** and **(b)**. **b**, Conformation of WT Orai<sub>cryt</sub> showing the released latches  
974 and closed pore. The amino acids that had been in the interface between M4b and M3 in the  
975 quiescent conformation are drawn as sticks, with the dashed region showing the same region as in  
976 **(a)**. **c**, Open conformation (H206A Orai<sub>cryt</sub>), depicted as in **(b)**. **d**, Unlatching is necessary for pore  
977 opening. A hybrid atomic model of the channel was generated using the conformations of the M1,  
978 M2 and M3 helices from the open conformation and the conformations of M4a/b and M4-ext from  
979 the quiescent conformation. In this model (shown in cartoon representation), molecular clashes exist  
980 between M4b and M3. Amino acids involved in the clashes are depicted as space-filling spheres  
981 (colored according channel region: red, M2; green, M3; yellow, M4a; orange, M4b; pink, M4-ext).  
982 These steric hindrances would prevent opening of the pore while the latches are fastened. With  
983 unlatching, the repositioning of the M4b helix would allow the outward motion of M1-M3 that opens  
984 the pore.

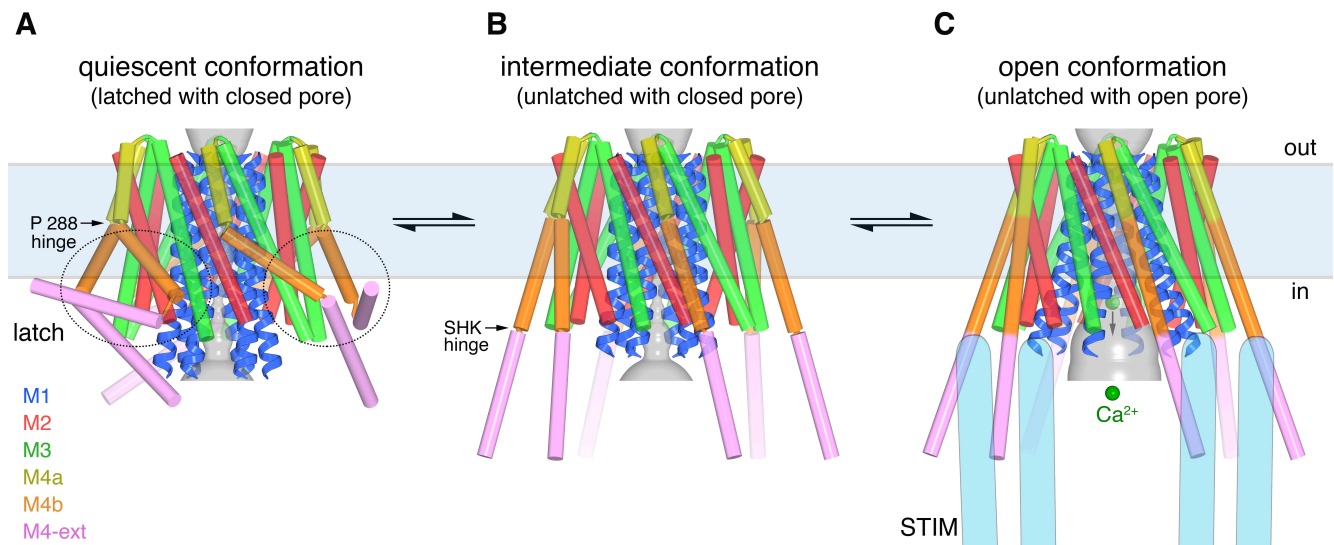

985  
986 **Figure 10.** Proposed sequence of channel activation. **a**, Quiescent conformation of Orai prior to  
987 binding of STIM (from PDB ID 4HKR, cylinders and ribbons). The pore (gray surface) is closed and the  
988 latches are fastened (two latches are indicated with dashed ovals). The M4 helices are bent at  
989 Pro288, delineating them into M4a and M4b. The M4b portions (orange) interact with the M3 helices  
990 (green), in six-fold fashion, and prevent the pore from opening by constraining the cytosolic region of  
991 the M3 helices. The interaction between M4b and M3 and the bend at Pro288 are stabilized by three  
992 sets of paired M4-ext helices. **b**, An intermediate conformation: structure of WT Orai<sub>cryst</sub> in which the  
993 pore is closed but the latches are released. Conformations of M1-M4a are indistinguishable from **(a)**  
994 (Figure 8D). When unlatched, mobile M4-ext regions are hypothesized to be available to interact  
995 with cytosolic regions of STIM that would become exposed as a result of depletion of Ca<sup>2+</sup> from the  
996 ER. Spontaneous unlatching would not necessarily require STIM binding and does not necessarily  
997 open the pore. **c**, Open conformation. The structure of H206A Orai<sub>cryst</sub> is shown (cylinders and  
998 ribbons), with approximate dimensions of the pore shown as a gray surface. Following store  
999 depletion, we hypothesize that STIM (blue shapes) engages with cytosolic regions of Orai and  
1000 stabilizes the pore in an open conformation. On the basis of the effects of the H206A mutation, we  
1001 suspect that the free energy difference between the intermediate and open conformations is on the  
1002 order of only a few hydrogen bonds. Unlatching is required to allow the widening of the pore and the  
1003 influx of Ca<sup>2+</sup> (green spheres). Arrows between conformations denote equilibria and the horizontal  
1004 rectangle indicates approximate boundaries of the plasma membrane. The depiction of the cytosolic  
1005 region of STIM is conceptual and is not meant to imply stoichiometry or conformation.

1006 **Movie 1.** Electron density for the open conformation from Figure 3.

1007 **Movie 2.** Video showing opening sequence as illustrated in Figure 10.

|                                                          | H206A Orai <sub>cryst</sub> |                     |                     |                     |
|----------------------------------------------------------|-----------------------------|---------------------|---------------------|---------------------|
|                                                          | Native                      | Ba <sup>2+</sup>    | Gd <sup>3+</sup>    | I <sup>-</sup>      |
| Space group                                              | I4 <sub>1</sub>             | I4 <sub>1</sub>     | I4 <sub>1</sub>     | I4 <sub>1</sub>     |
| Datasets source                                          | APS 24ID-C                  | APS 24ID-C          | APS 23ID-D          | APS 23ID-D          |
| Wavelength (Å)                                           | 1.1000                      | 1.7000              | 1.7000              | 1.7085              |
| Cell dimensions:                                         |                             |                     |                     |                     |
| a, b, c (Å)                                              | 262.3, 262.3, 220.4         | 265.0, 265.0, 219.9 | 255.4, 255.4, 216.0 | 266.4, 266.4, 221.5 |
| α= β= γ (°)                                              | 90                          | 90                  | 90                  | 90                  |
| Resolution (Å)                                           | 50-6.70 (6.82-6.70)         | 50-7.40 (7.53-7.40) | 50-7.90 (8.04-7.90) | 50-7.6 (7.68-7.60)  |
| No. of crystals                                          | 1                           | 1                   | 1                   | 2                   |
| R <sub>Sym</sub> (%)                                     | 8.3 (>100)                  | 22.5 (>100)         | 12.1 (>100)         | 14.0 (>100)         |
| R <sub>pm</sub> (%)                                      | 1.1 (57.0)                  | 3.4 (46.7)          | 2.4 (42.8)          | 1.1 (62.0)          |
| CC <sub>1/2</sub> (in outer shell)                       | 0.214                       | 0.173               | 0.158               | 0.493               |
| I/σI                                                     | 92.4 (1.1)                  | 47.0 (1.4)          | 37.5 (2.0)          | 26.8 (0.2)          |
| Completeness (%)                                         | 100.0 (100.0)               | 100.0 (100.0)       | 100.0 (100.0)       | 99.9 (99.7)         |
| Redundancy                                               | 55.8 (58.7)                 | 46.5 (51.8)         | 25.1 (26.0)         | 165.1 (172.5)       |
| Figure of Merit (DM)                                     | 0.729 [20-6.7Å]             |                     |                     |                     |
| <b>Refinement</b>                                        | PDB ID: 6BBF                |                     |                     |                     |
| Resolution (Å)                                           | 20-6.7                      |                     |                     |                     |
| No. of reflections                                       | 12844                       |                     |                     |                     |
| R <sub>work</sub> (%)                                    | 30.6                        |                     |                     |                     |
| R <sub>free</sub> (%)                                    | 33.9                        |                     |                     |                     |
| CC <sub>work</sub> / CC <sub>free</sub> (in outer shell) | 0.285 / 0.220               |                     |                     |                     |
| No. atoms                                                | 27120                       |                     |                     |                     |
| Ramachandran (%)                                         |                             |                     |                     |                     |
| Favored                                                  | 97.22                       |                     |                     |                     |
| Outliers                                                 | 1.04                        |                     |                     |                     |
| R.m.s.d:                                                 |                             |                     |                     |                     |
| bond lengths (Å)                                         | 0.005                       |                     |                     |                     |
| bond angles (°)                                          | 1.15                        |                     |                     |                     |

1008 **Table 1.** H206A Orai<sub>cryst</sub> data collection, phasing and refinement statistics. Data collection statistics  
1009 are from HKL3000 (Otwinowski & Minor, 1997) or XDS (I<sup>-</sup> experiment) (Kabsch, 2010).  $R_{sym} = \sum |I_i - \langle I_i \rangle| / \sum I_i$ , where  $\langle I_i \rangle$  is the average intensity of symmetry-equivalent reflections.  $CC_{1/2}$ ,  $CC_{work}$  and  
1010  $CC_{free}$  are defined in (Karplus & Diederichs, 2012). Phasing power =  $RMS (|F|/\epsilon)$ , where  $|F|$  is the  
1011 heavy-atom structure factor amplitude and  $\epsilon$  is the residual lack of closure error.  $R_{cullis}$  is the mean  
1012 residual lack of closure error divided by the dispersive or anomalous difference.  $R_{work} = \sum |F_{obs} - F_{calc}| / \sum |F_{obs}|$ , where  $F_{obs}$  and  $F_{calc}$  are the observed and calculated structure factors, respectively.  $R_{free}$  is  
1013 calculated using a subset (~10%) of reflection data chosen randomly and omitted throughout  
1014 refinement. Figure of merit is indicated after density modification and phase extension starting from  
1015 9.0 Å in DM. R.m.s.d : root mean square deviations from ideal geometry. Numbers in parentheses  
1016 indicate the highest resolution shells and their statistics.  
1017  
1018

|                                                          | K163W Orai <sub>cryst</sub>      |                     | K163W Orai <sub>cryst</sub> |                     | WT Orai <sub>cryst</sub> |
|----------------------------------------------------------|----------------------------------|---------------------|-----------------------------|---------------------|--------------------------|
|                                                          | Native                           | Native              | Derivative 1<br>PCMB        | Derivative 2<br>PIP | Native                   |
| Space group                                              | P4 <sub>2</sub> 2 <sub>1</sub> 2 | I4 <sub>1</sub>     | I4 <sub>1</sub>             | I4 <sub>1</sub>     | I4 <sub>1</sub>          |
| Datasets source                                          | NSLS X25                         | NSLS X25            | NSLS X29                    | NSLS X29            | NSLS X25                 |
| Wavelength (Å)                                           | 1.1000                           | 1.1000              | 1.0074                      | 1.0712              | 1.738                    |
| Cell dimensions:                                         |                                  |                     |                             |                     |                          |
| a, b, c (Å)                                              | 118.7, 118.7, 122.4              | 247.5, 247.5, 210.2 | 246.1, 246.1, 210.0         | 250.6, 250.6, 211.8 | 250.4, 250.4, 210.4      |
| α= β= γ (°)                                              | 90                               | 90                  | 90                          | 90                  | 90                       |
| Resolution (Å)                                           | 60-4.35 (4.42-4.35)              | 50-6.10 (6.20-6.10) | 50-6.10 (6.20-6.10)         | 50-6.90 (7.02-6.90) | 50-6.9 (7.02-6.90)       |
| No. of crystals                                          | 1                                | 1                   | 1                           | 1                   | 1                        |
| R <sub>sym</sub> (%)                                     | 6.0 (>100)                       | 5.9 (>100)          | 5.7 (>100)                  | 12.0 (>100)         | 9.4 (>100)               |
| R <sub>rim</sub> (%)                                     | 1.7 (55.7)                       | 1.3 (>100)          | 1.9 (>100)                  | 3.1 (>100)          | 3.0 (>100)               |
| CC <sub>1/2</sub> (in outer shell)                       | 0.265                            | 0.376               | 0.378                       | 0.170               | 0.123                    |
| I/σ                                                      | 61.1 (1.0)                       | 69.0 (1.0)          | 49.3 (0.7)                  | 37.0 (0.7)          | 39.1 (0.5)               |
| Completeness (%)                                         | 100.0 (100.0)                    | 100.0 (100.0)       | 99.9 (100)                  | 99.9 (100)          | 99.7 (99.8)              |
| Redundancy                                               | 16.4 (16.9)                      | 22.9 (23.9)         | 21.5 (20.5)                 | 16.3 (16.7)         | 11.0 (11.6)              |
| <b>MIRAS Phasing</b>                                     |                                  |                     |                             |                     |                          |
| No. of sites                                             |                                  |                     | 24                          | 24                  |                          |
| Phasing power (iso/ano)                                  |                                  |                     | 0.523 / 0.559               | 0.405 / 0.686       |                          |
| R <sub>cullis</sub> (iso/ano)                            |                                  |                     | 0.764 / 0.945               | 0.952 / 0.919       |                          |
| Figure of Merit (DM)                                     | 0.627 [20-4.35Å]                 | 0.629 [20-6.1Å]     |                             |                     | 0.777 [20-6.9Å]          |
| <b>Refinement</b>                                        | PDB ID: 6BBI                     | PDB ID: 6BBH        |                             |                     | PDB ID: 6BBG             |
| Resolution (Å)                                           | 20-4.35                          | 20-6.1              |                             |                     | 20-6.9                   |
| No. of reflections                                       | 6035                             | 14682               |                             |                     | 10287                    |
| R <sub>work</sub> (%)                                    | 30.6                             | 31.4                |                             |                     | 33.4                     |
| R <sub>free</sub> (%)                                    | 32.9                             | 34.0                |                             |                     | 35.4                     |
| CC <sub>work</sub> / CC <sub>free</sub> (in outer shell) | 0.487 / 0.441                    | 0.346 / 0.333       |                             |                     | 0.332 / 0.414            |
| No. atoms                                                | 3338                             | 27360               |                             |                     | 27240                    |
| Ramachandran (%)                                         |                                  |                     |                             |                     |                          |
| Favored                                                  | 95.5                             | 97.2                |                             |                     | 96.6                     |
| Outliers                                                 | 0.24                             | 1.01                |                             |                     | 0.93                     |
| R.m.s.d:                                                 |                                  |                     |                             |                     |                          |
| bond lengths (Å)                                         | 0.006                            | 0.005               |                             |                     | 0.005                    |
| bond angles (°)                                          | 1.15                             | 1.06                |                             |                     | 1.07                     |

1019 **Table 2.** Data collection, phasing and refinement statistics for WT and K163W Orai<sub>cryst</sub>. Data collection  
1020 statistics are from HKL3000 (Otwinowski & Minor, 1997).  $R_{sym} = \sum |I_i - \langle I_i \rangle| / \sum I_i$ , where  $\langle I_i \rangle$  is the average  
1021 intensity of symmetry-equivalent reflections.  $CC_{1/2}$ ,  $CC_{work}$  and  $CC_{free}$  are defined in (Karplus & Diederichs,  
1022 2012). Phasing power = RMS ( $|F|/\epsilon$ ), where  $|F|$  is the heavy-atom structure factor amplitude and  $\epsilon$  is the  
1023 residual lack of closure error.  $R_{cullis}$  is the mean residual lack of closure error divided by the dispersive or  
1024 anomalous difference.  $R_{work} = \sum |F_{obs} - F_{calc}| / \sum |F_{obs}|$ , where  $F_{obs}$  and  $F_{calc}$  are the observed and calculated  
1025 structure factors, respectively.  $R_{free}$  is calculated using a subset (~10%) of reflection data chosen randomly and  
1026 omitted throughout refinement. Figure of merit is indicated after density modification and phase extension  
1027 starting from 8.0 Å in DM. R.m.s.d : root mean square deviations from ideal geometry. Numbers in parentheses  
1028 indicate the highest resolution shells and their statistics.
